# Clarifying the role of higher-level cortices in resolving perceptual ambiguity using Ultra High Field fMRI

Logan Dowdle<sup>1\*</sup>, Geoffrey Ghose<sup>1</sup>, Kamil Ugurbil<sup>1</sup>, Essa Yacoub<sup>1</sup>, Luca Vizioli<sup>1\*</sup>

1. Center for Magnetic Resonance Research, University of Minnesota 2021 6th St SE, Minneapolis, MN 55455

\* Luca Vizioli and Logan Dowdle

Email: [luca.vizioli1@gmail.com](mailto:luca.vizioli1@gmail.com); [logan.dowdle@gmail.com](mailto:logan.dowdle@gmail.com)

Subject Area

Neuroscience

Keywords

Top-down; fMRI; Ultra High Field; Cognitive Neuroscience; Vision; Perception; Cortical Network; Task modulations;

Author Contributions

L.V. designed and conducted the experiment; L.V. and L.D. performed the analyses, wrote the manuscript and generated the figures. E.Y. and K.U. provided guidance on choice and optimization of MR acquisition sequences; G.G. provided guidance on conceptual framework; E.Y., K.U. and G.G. contributed to manuscript formulation and writing.

## 21 **Abstract**

22           The brain is organized into distinct, flexible networks. Within these networks, cognitive variables  
23 such as attention can modulate sensory representations in accordance with moment-to-moment  
24 behavioral requirements. These modulations can be studied by varying task demands; however, the  
25 tasks employed are often incongruent with the postulated functions of a sensory system, limiting the  
26 characterization of the system in relation to natural behaviors. Here we combine domain-specific task  
27 manipulations and ultra-high field fMRI to study the nature of top-down modulations. We exploited  
28 faces, a visual category underpinned by a complex cortical network, and instructed participants to  
29 perform either a stimulus-relevant/domain-specific or a stimulus-irrelevant task in the scanner. We  
30 found that 1. perceptual ambiguity (i.e. difficulty of achieving a stable percept) is encoded in top-down  
31 modulations from higher-level cortices; 2. the right inferior-temporal lobe is active under challenging  
32 conditions and uniquely encodes trial-by-trial variability in face perception.

## 33 Introduction

34 Decades of human and animal research has demonstrated that cortical areas are functionally and  
35 anatomically linked to form distinct brain networks. Understanding the distinct contributions of  
36 individual areas within these networks has been challenging in part because of the rich and reciprocal  
37 pattern of connections between brain areas (Alexander et al., 1986; Felleman and Van Essen, 1991;  
38 Moeller et al., 2008). Discrimination is further confounded by the low latencies with which signals travel  
39 between areas (Laughlin and Sejnowski, 2003; Wang et al., 2008), substantial overlaps in the functional  
40 sensitivities of neurons of different areas (Arcaro and Livingstone, 2017; Haxby et al., 2001; Vogels and  
41 Orban, 1994), and the flexibility of connections necessary to maintain function across a range of tasks  
42 and environments (Bassett et al., 2011; Gonzalez-Castillo and Bandettini, 2018; Kabbara et al., 2017). A  
43 critical component of this flexibility in sensory systems is top-down control, in which cognitive variables  
44 such as attention, value, and memory can alter sensory representations in accordance with explicit or  
45 specific behavioral demands. Yet this flexibility also is a major challenge to experimental studies, because  
46 it implies that the nature of signal processing both within and between brain areas of a network is not  
47 fixed and very much depends on the behavioral context and goals of the subject.

48 While many humans and animal studies have demonstrated the ability of task manipulations to  
49 modulate sensory evoked responses, in most cases these studies have employed tasks that are not  
50 specific to the domain of the stimulus that was presented. For example, numerous electrophysiological  
51 and imaging studies suggest that attending to a particular location in visual space increases the  
52 responses of neurons whose receptive fields lie within the attended location irrespective of the  
53 selectivities of those receptive fields (Cohen and Maunsell, 2011; Liu et al., 2015; Martinez-Trujillo and  
54 Treue, 2004). Similarly, perceptual tasks involving working memory often result in a broad distribution  
55 of enhanced signals in sensory areas (Druzgal and D'Esposito, 2003, 2001; Kay and Yeatman, 2017; Leung

56 and Alain, 2011; Pessoa et al., 2002). By contrast, top-down modulation from domain-specific tasks can  
57 be far more targeted, selectively enhancing only those neurons whose receptive field responses are  
58 consistent with behavioral demands (De Martino et al., 2015; Zhang and Kay, 2020). Accordingly, the use  
59 of appropriate domain specific tasks is likely to highlight those neurons with relevant selectivities and  
60 reveal how they contribute to perception. For example, contrasting the activity elicited by identical face  
61 stimuli in an N-back and a fixation task may reveal working memory related modulations that are  
62 unspecific to face processing and therefore fail to elucidate the changes related to the specialized  
63 processing of faces. Indeed, a N-back face task could be performed without explicit face recognition or  
64 perception; additionally, one could imagine that explicit vs. implicit face detection may be underpinned  
65 by different neural computations, and therefore, implementing a task with no explicit requirement may  
66 represent a confound or lead to a different set of results.

67         Establishing how different areas within a network contribute to perception requires sampling the  
68 entire network and then identifying the particular areas that can best explain task performance.  
69 However, technical limitations have precluded this approach. Invasive electrophysiological studies are  
70 necessarily highly targeted and unable to sample across an entire brain network. In addition, these  
71 techniques are frequently performed in non-human primates, with tasks that fail to capture the cognitive  
72 sophistication available to humans. Moreover, even whole brain studies, such as those relying upon  
73 functional magnetic resonance imaging, are often highly biased in their sampling because of the difficulty  
74 of imaging particular areas. For example, a number of high-level areas – crucial for human cognition –  
75 are located in cortical loci that are traditionally difficult to image (e.g. due to low SNR and their proximity  
76 to air cavities (Chen et al., 2003; Devlin et al., 2000)). These limitations also constrain our ability to  
77 establish appropriate animal models for invasive measurements and manipulations because of the  
78 possibility that human areas homologous to those in animal studies are difficult to sample with  
79 conventional gradient echo fMRI methods (Rajimehr et al., 2009). Signal to noise issues have also limited

80 the ability of fMRI to establish trial-to-trial behavioral covariance, which is a critical requirement for  
81 understanding the neural basis of perception (Parker and Newsome, 1998) and has been extensively  
82 employed by electrophysiology studies (Desimone et al., 1984; Hubel and Wiesel, 1959; Martinez-Trujillo  
83 and Treue, 2004; Perrett et al., 1982). This is a particularly important consideration because, by  
84 definition, all areas within a network are co-activated, but, given the richness of connectivity within the  
85 network, that co-activation does not necessarily imply perceptual relevance.

86 While the difficulties surrounding magnetic field inhomogeneity and transmit uniformity can be  
87 more detrimental at higher fields, there are substantial SNR gains available with ultra-high field magnets  
88 (UHF i.e. 7T and above). In common practice, these SNR gains are generally traded for higher resolutions  
89 (e.g. submillimeter). In this paper we instead select a relatively lower resolution (i.e. 1.6 mm<sup>3</sup>) and  
90 leverage the improved SNR available in UHF fMRI to study the entire ensemble of brain areas associated  
91 with a behaviorally important high-level perceptual task, namely the detection of faces in poor visibility.  
92 We choose faces as these are a well-studied, cross species visual category that is highly meaningful and  
93 therefore ideal for investigating high-level, top-down neural modulations. The human face processing  
94 network has however proved challenging to study (Kanwisher et al., 1997; Kanwisher and Yovel, 2006;  
95 McCarthy et al., 1997) (see Grill-Spector & Weiner 2014 for review), because many of its areas, due to  
96 their proximity to air cavities, are heavily affected by the aforementioned fMRI signal difficulties. In order  
97 to combat susceptibility related dropout we leverage the improved acceleration available at high fields  
98 to increase our imaging resolution to 1.6mm relative to the 2mm gold-standard for 3T studies. Combined  
99 with manual shimming, this yields substantial gains in SNR, while reducing drop out (Farzaneh et al.,  
100 1990; Olman et al., 2009; Young et al., 1988) in key human face processing areas. In the current work,  
101 we varied the visibility of face stimuli by modulating their phase coherence (Figure 1) and instructed the  
102 subjects to perform 2 tasks in the scanner: a domain-specific, stimulus relevant task involving perceptual  
103 judgment of the visual stimuli (i.e. face detection); and, stimulus irrelevant fixation task. By leveraging

104 signal gains derived from our imaging approach, we then contrast these responses to isolate top-down  
105 modulations specific to the face domain and link subjective perception to brain activity.

106

## 107 **Materials and Methods**

### 108 Participants

109 10 (5 females) healthy right-handed subjects (age range: 18-31) participated in the study. Of  
110 these, 1 participant was re-scanned due to excessive motion during scanning. All subjects had normal,  
111 or corrected vision and provided written informed consent. The local IRB at the University of Minnesota  
112 approved the experiments.

113

### 114 Stimuli and procedure

115 The experimental procedure consisted of a standard block design face localizer and a fast event-  
116 related face paradigm. For both experiments, the stimuli were centered on background of average  
117 luminance (25.4 cd/m<sup>2</sup>, 23.5-30.1). Stimuli were presented on a Cambridge Research Systems  
118 BOLDscreen 32 LCD monitor positioned at the head of the 7T scanner bed (resolution 1920, 1080 at 120  
119 Hz; viewing distance ~89.5 cm) using a Mac Pro computer. Stimulus presentation was controlled using  
120 Psychophysics Toolbox (3.0.15) based code. Participants viewed the images through a mirror placed in  
121 the head coil. Behavioral responses were recorded using Cambridge Research Systems button box and  
122 Psychophysics Toolbox.

123

### 124 Face localizer

#### 125 *Stimuli*

126 All visual stimuli used for the face localizer consisted of grayscale photographs depicting 20  
127 different faces (10 identities × 2 genders) and objects (both taken from Stigliani et al., 2015) and textures  
128 of noise.

129           The experiment consisted of the presentation of grayscale stimuli drawn from different stimulus  
130 categories. There were 11 categories, grouped into 3 stimulus domains: faces (adult, child), no face  
131 objects (including characters (word, number), body parts (body, limb), places (corridor, house), and  
132 objects (car, instrument)) and phase scrambled faces, computed by randomly scrambling the phase  
133 coherence of the face stimuli. Each stimulus was presented on a scrambled background (different  
134 backgrounds for different stimuli) and occupied a square region with dimensions  $10^\circ \times 10^\circ$ . Noise texture  
135 stimuli were created by randomly scrambling the phase of the face images (i.e. 0% phase coherence).

136           The stimuli were equated in terms of luminance, contrast and spatial frequency content by taking  
137 the Fourier spectra across stimuli and ensuring that the rotational average amplitudes for a given spatial  
138 frequency were equated across images while preserving the amplitude distribution across orientations  
139 (Willenbockel et al., 2010). The root mean square contrast (i.e. the standard deviation of pixel intensity)  
140 was also kept constant across stimuli.

141

### 142           *Visual presentation paradigm*

143           Face localizer runs involved presentation of blocks of faces, objects and noise textures. Each run  
144 began with presentation of a black fixation cross displayed on a grey background for 12 sec and consisted  
145 of 9 randomly presented blocks of images. Each block (3 blocks/category; separated by a 12 sec fixation)  
146 involved presentation of 10 different stimuli randomly presented for 800 ms, separated by a 400 ms  
147 interstimulus interval (ISI). To ensure that participants' attention was maintained throughout the  
148 localizer we implemented a 1-back task, where subjects were instructed to respond to the repetition of  
149 2 identical stimuli (representing about 10% of the trials), by pressing a button on a response pad held in  
150 their right hand. All participants completed two runs of the block design face localizer, where each block  
151 occurred 3 times within a run, for a total run duration of 228 seconds.



152

153 *Event related experiment.*

154 *Stimuli*

155 We used grayscale images of faces (20 male and 20 female), presenting neutral expressions. We  
156 manipulated the phase coherence of each face, from 0% to 40% in steps of 10%, resulting in 200 images  
157 (5 visual conditions x 20 identities x 2 genders). We equated the amplitude spectrum across all images.  
158 Stimuli approximately subtended 9° of visual angle. Faces were cropped to remove external features by  
159 centering an elliptical window with uniform gray background to the original images. The y diameter of  
160 the ellipse spanned the full vertical extent of the face stimuli and the x diameter spanned 80% of the  
161 horizontal extent. Before applying the elliptical window to all face images, we smoothed the edge of the  
162 ellipse by convolving with an average filter (constructed using the “fspecial” function with “average”  
163 option in MATLAB – see Figure 1A). This procedure was implemented to prevent participants from  
164 performing edge detection, rather than the face detection task, by reacting to the easily identifiable  
165 presence of hard edges in the face images.

166 Like for the localizer experiment, here too we equated amplitude spectrum across the whole  
167 stimulus set. We controlled the Fourier spectra across stimuli, ensuring that the rotational average  
168 amplitudes for a given spatial frequency were equated across images while preserving the amplitude  
169 distribution across orientations (Willenbockel et al., 2010). The root mean square contrast (i.e. the  
170 standard deviation of pixel intensity) was also kept constant across stimuli.

171

172 *Tasks*

173 In the scanner, participants were instructed to maintain fixation on a central cross throughout  
174 the run and to perform one of 2 tasks: one domain-specific face detection task, involving perceptual  
175 judgment of the visual stimuli; and a second, difficult, non-specific attention fixation task that required  
176 responding to a specific color change (i.e. red) of the fixation cross.

177 In the former, participants were instructed to respond as quickly as possible by pressing one of 2  
178 buttons on their button box to indicate whether they perceived a face. Subjects' instructions were  
179 carefully delivered to indicate that there were no correct answers and that we were instead interested  
180 in the subjects' perception only (Figure 1B).

181 The latter was designed to isolate bottom-up stimulus-driven responses. In order to ensure this,  
182 we piloted the fixation task to maximize task difficulty and direct the attention away from the face stimuli  
183 on 4 participants that were not included in the experimental subject pool. Based on participants'  
184 feedback, the fixation tasks entailed pressing a button every time the fixation turned red. Every 500 ms,  
185 the fixation changed to one of five colors — specifically red, blue, green, yellow and cyan — in a  
186 pseudorandom fashion, avoiding consecutive presentations of the same color (Figure 1C). The color  
187 change occurred out of sync with the stimulus presentation onset and frequency of button presses was  
188 kept constant across tasks. Visual stimuli were identical across tasks to ensure that any differences  
189 observed were related solely to top-down processes. Tasks were blocked by run and counterbalanced  
190 across participants.

191

### 192 *Visual presentation paradigm.*

193 We acquired 3 runs per task. Each run lasted approximately 3 mins and 22 secs and began and  
194 ended with a 12-second fixation period. Within each run, we showed 40 images (5 phase coherence  
195 levels x 4 identities x 2 genders) presented for 2000 ms, with a 2000 ms interstimulus interval (ISI).

196 Importantly, we introduced 10% blank trials (i.e. 4000 ms of fixation period) randomly interspersed  
197 amongst the 40 images, effectively jittering the ISI. Stimulus presentation was pseudorandomized across  
198 runs, with the only constraint being the non-occurrence of 2 consecutive presentations of the same  
199 phase coherence level. Behavioral metrics, including reaction time and responses to face stimuli  
200 indicating participants' perceptual judgments (i.e. face or no face) were generated per subject and then  
201 averaged.

202

### 203 *Ambiguity Calculation*

204 For the face detection task, we calculated the average face response percentage to each  
205 phase condition, averaged across runs. These values vary from 0 to 100%, representing consistent non-  
206 face to consistent face response respectively. Within each subject, this produces a sigmoidal shaped  
207 curve. We mathematically define the ambiguity score, on a subject by subject basis, as the inverse of the  
208 absolute distance from the inflection point on the sigmoid that fit this curve This is shown in Equation 1:

209 Eq 1.  $(|S_i - S_k| \times -1) + \min(A)$

210 where  $S_i$  is the  $i$ th point of the faceness sigmoid,  $S_k$  is the theoretical midpoint of the faceness  
211 sigmoid and  $\min(A)$  is the minimum value of the ambiguity function. While conceptually similar to  
212 defining a perceptual threshold, the goal of this analytical approach is to characterize the instability of  
213 the percept in a threshold-free, data-driven manner for all visual conditions, rather than determining the  
214 precise level of phase coherence information required to achieve a reliable face percept.

### 215 *MR Imaging Acquisition and Processing*

216 All functional MRI data were collected with a 7T Siemens Magnetom System with a 1 by 32-  
217 channel NOVA head coil. T2\*-weighted images were collected using sequence parameters (TR 1s,

218 Multiband 5, GRAPPA 2 , 7/8ths Partial Fourier, 1.6mm isotropic, TE 22ms, Flip Angle 52°, Bandwidth  
219 1923Hz, 85 slices, FOV 208 x 208 mm) matched to the Human Connectome 7T protocol (Thanh Vu et al.,  
220 2017).

221 A number of steps were taken to maximize signal quality of the present study. First, we manually  
222 shimmed the B0 field to maximize homogeneity over ventral and anterior-temporal regions. Moreover,  
223 we selected our flip angle based on the offset between the selected flip angle and the subject specific  
224 flip angle, using the results from a 3dAFI (Actual Flip Angle Image) sequence. In this way we optimized  
225 flip angles across the brain to maximize SNR in the ventral and anterior-temporal regions. Finally, by  
226 taking advantage of the greater ability to accelerate image acquisition at 7T, we were able to obtain  
227 higher resolution images and relative reductions in magnetic susceptibility dropout in these regions  
228 (Farzaneh et al., 1990; Olman et al., 2009; Young et al., 1988).

229 T1-weighted anatomical images were obtained using an MPRAGE sequence (192 slices; TR, 1900  
230 ms; FOV, 256 x 256 mm; flip angle, 9°; TE, 2.52 ms; spatial resolution, .8 mm isotropic voxels) which were  
231 collected with a 3T Siemens Magnetom Prisma<sup>fit</sup> system. Anatomical images were used for visualization  
232 purposes only.

233

### 234 *Functional Image Processing*

235 Dicom files were converted using dcm2niix (Li et al., 2016). Subsequence functional image  
236 processing was performed in AFNI version 19.2.10 (Cox, 1996). Conventional processing steps were used,  
237 including despiking, slice timing correction, distortion and motion correction, and alignment to each  
238 participant's anatomical image. With each task type, the target for time series and anatomical alignment  
239 was the Single Band Reference (SBRef) image which is acquired to calibrate coil sensitivity profiles prior  
240 to the multiband acquisition and has no slice acceleration or T<sub>1</sub>-saturation, yielding high contrast (Smith

241 et al., 2013). In order to improve localizer and task alignment, an additional nonlinear transform was  
242 computed between the task SBRef and localizer SBRef. All spatial transforms were concatenated and  
243 applied in a single step to reduce image blurring, and functional images were inspected to confirm  
244 successful registration to anatomical targets.

245

### 246 *Localizer Task Analyses*

247 For the functional localizer, the data was then smoothed with a Gaussian kernel with FWHM of  
248 2 voxels (3.2mm), and each run scaled to have mean 100. For regressors of no interest, the 6 estimated  
249 rigid-body motion parameters and polynomials up to order 3 (including linear trend) were added to the  
250 design matrix.

251

### 252 *Functional ROI Definition*

253 Using 3dDeconvolve, the data were passed through a GLM in order to determine the response  
254 to faces, objects and noise. Each event was modeled as a 12s box car, convolved with AFNI's SPMG1 HRF  
255 estimation. Rather than select face patches by comparing face activation to the average of objects and  
256 noise, we instead constrained the statistical map in the following ways: 1) Betas to faces were positive,  
257 2) the T-stat used for thresholding was the minimum positive T-stat from faces > objects or faces > noise.  
258 In other words, we selected voxels that were significant for faces greater than objects, in conjunction  
259 with faces greater than scrambled. Regions of interest (ROIs) were derived in volume space, and all  
260 consisted of contiguous clusters made up of 19 or more voxels. Statistical thresholding was adjusted to  
261 obtain consistency between subjects, no voxels above  $p < 0.05$  were considered. To aid in ROI definition,  
262 we simultaneously viewed the surface representation of the statistical map using SUMA (Saad and

263 Reynolds, 2012) with FreeSurfer (Dale et al., 1999; Fischl et al., 2004, 2002, 2001) defined cortical  
264 surfaces and atlas labels. In addition, to supplement the statistical parametric maps, we used finite  
265 impulse response (FIR) deconvolution, with 20 bins, to estimate HRFs in response to each localizer  
266 condition (face, scrambled, object). These HRFs were also used to inspect data quality for each ROI.

267

### 268 *Face Detection and Fixation Color Tasks Analyses*

269 For the Face/Fix detection tasks, the data were only scaled following initial processing, no  
270 smoothing was used. As we were interested in BOLD responses across the whole brain, and we know  
271 that hemodynamic response functions differ across cortical regions (Handwerker et al., 2004; Lewis et  
272 al., 2018; Taylor et al., 2018), we performed a GLM based finite impulse response (FIR) deconvolution  
273 analyses, which does not make assumptions regarding the shape of the HRF. This was done using AFNI's  
274 TENTZero method, estimating responses with 1s bins out to 15s post stimulus. Deconvolution was  
275 performed separately for each task (face detection and fixation) and phase coherence condition,  
276 generating 5 FIR curves for the fixation task and 5 for the face detection task. For each task and  
277 independently per subject, ROI, run and condition, we averaged all FIR curves across all voxels. To avoid  
278 the contribution of extreme voxels, we trimmed 5% of the values falling at each extreme of the  
279 distribution tail to compute the 10% trimmed mean. We then extracted the 4 timepoints corresponding  
280 to 4, 5, 6 and 7 seconds after stimulus onset, i.e. those with the largest amplitude within a time window  
281 spanning from 2 to 10 TRs after stimulus onset. The 12 extracted amplitudes (4 timepoints per run) were  
282 then averaged within experimental tasks to obtain one percent signal change value per subject, ROI, task  
283 and condition.

284

### 285 *Statistical Analyses*

286 To test for statistically significant differences between conditions (i.e. phase coherence levels)  
287 and tasks, we carried out the following statistical tests.

288

### 289 *Task and Condition Analyses*

290 Independently per ROI, we performed a 2 (tasks) by 5 (phase coherence levels) repeated  
291 measures ANOVA with the mean BOLD response as a dependent variable. To control for family wise error  
292 rate (FWER), we implemented the following multiple comparison correction procedure: we began by  
293 centering the data on the group mean for each condition and task. This procedure effectively put the  
294 data under the ideal H0 hypothesis of no difference between the means. We then sampled with  
295 replacement the subjects and performed the same 2 x 3 repeated measures ANOVA and stored all F  
296 values for the relevant main effects and interactions. We repeated this procedure 10,000 times and  
297 selected the 95% largest F values. We used these F values as our new thresholds and considered  
298 statistical significance only when p values for the original ANOVA were smaller than .05 *and* the  
299 connected F values were larger than their centered counterpart (e.g. (Wilcox, 2005))

300 When appropriate (i.e. for comparisons entailing more than 2 factors), we further performed  
301 post-hoc paired sample t-tests on significant (as defined above) main effects and interactions. The same  
302 FWER control procedure described above for the ANOVA test was implemented to account for multiple  
303 comparisons.

304 Additionally, we performed power analyses to determine effect size and the sample size required  
305 to achieve adequate power (see results). Specifically, we computed Hedges' g (Freeman et al., 1986;  
306 Hedges, 1981). This choice was motivated by the fact that, unlike Cohen's d, which, especially for small  
307 samples (i.e.  $n < 20$ ), tends to provide positively biased estimators of population effect sizes (Freeman  
308 et al., 1986; Lakens, 2013), Hedges' g tends to be unbiased (Cumming, 2012).

309

310 *Functional connectivity analyses.*

311 To determine the extent to which task demands modulate functional connectivity amongst face  
312 ROIs, we carried out the following analysis. Independently per subject, task and ROI, we averaged (mean)  
313 all FIR response curves amongst voxels and concatenated the time courses elicited by each condition to  
314 produce a single time course. The concatenation was done to maximize statistical power, as the resulting  
315 time course contained 80 timepoints (i.e. 16 FIR timepoints x 5 conditions). For each subject and task,  
316 we then computed Pearson's correlation coefficient between the concatenated time courses of all  
317 possible pairs of ROIs. This procedure lead to the formulation of 2 connectivity matrices (12 ROIs x 12  
318 ROIs) per subject (1 per task) summarizing the similarity of BOLD responses between all pairs of ROIs. To  
319 convert the skewed sampling distribution of Pearson's r into a normal distribution we computed Fisher's  
320 z transformation (Fisher, 1915). We therefore proceeded to carry out paired sample t-tests between the  
321 connectivity estimated obtained for the 2 tasks. To control for FWER, we implemented the same  
322 bootstrap procedure on centered data described in the previous paragraphs (see paragraph 4.6.1). For  
323 display purposes only, after computing the mean between the Fisher z-normalized connectivity matrices,  
324 we computed the inverse of such transformation on the group average connectivity matrices to convert  
325 these scores back into meaningful and interpretable Pearson's r.

326 To better visualize the results of our functional connectivity analysis, we further performed  
327 classic multidimensional scaling (MDS - using the function "cmdscale" in MATLAB) on the participants  
328 average dissimilarity matrix (i.e. 1- Pearson's r). MDS was performed independently per task. For ease  
329 of visual comparison, the MDS arrangements of the 2 tasks were aligned by means of linear  
330 transformations (including translation, reflection, orthogonal rotation, and scaling) using Procrustes



331 rotations (this was implemented with the “procrustes” function in MATLAB) with the sum of squared  
332 errors as stress metric.

333 MDS is a useful data driven approach to visualize the data projected into a new space whose  
334 dimensions are the first (in this case 2) eigenvectors (i.e. those explaining most of the variance in the  
335 data) without any prior hypotheses. MDS is therefore a dimension reduction technique that highlights  
336 the dominant features in the data. Results are shown in Figure 4; distance between the points indicate  
337 dissimilarity of responses.

338

339 *Brain-behavior correlation.*

340 Next for each ROI, we wanted to assess the relationship between behavioral responses and top-  
341 down BOLD modulations. To this end, for each subject and ROI, we computed Pearson’s correlation  
342 coefficients amongst the ambiguity scores at each phase coherence level and the task difference in  
343 average BOLD amplitudes elicited by each condition. We then performed Fisher z transform (see  
344 paragraph above) on Pearson’s r and carried out one sample t-test for each ROI to determine whether  
345 the average group correlation was significantly larger than 0. To control the family wise error rate  
346 (FWER), we implemented the same bootstrap procedure on centered data described in the previous  
347 paragraphs (see paragraph 4.6.1). For display purposes only, after computing the mean between the  
348 Fisher z-normalized correlation scores, we computed the inverse of such transformation on the group  
349 average to convert these scores back into meaningful and interpretable Pearson’s r.

350

351 *Perception-Based Analyses*

352           We performed additional analyses to assess BOLD amplitude modulations as a function of  
353   percept. Due to the grouping of responses, we considered only the most ambiguous condition (i.e. 20%  
354   phase coherence, see results). We allocated each trial to one of 2 new conditions: “*face percept*” and  
355   “*no face percept*” on the basis of each participants reported percept. We then repeated the analysis  
356   described in section 2.5.4 to estimate BOLD amplitudes of these 2 conditions.

357

## 358 **Results**

359           Through this work, the prefixes “l” and “r” preceding the name of a ROI will refer to its  
360 hemispheric lateralization.

361

### 362           Localizer Task.

363           Using the separate face-localizer task, we identified a total of twelve ROIs for all participants. This  
364 included typical regions, such as the fusiform face area (FFA, MNI Centers of Mass [L: -41 -52 -19, R: 40 -  
365 54 -17]), occipital face area (OFA [L: -44 -83 -13, R:43 -76 -11]), posterior superior temporal sulcus (STS  
366 [L: -48 -68 10, R: 50 -57 18]) as well as the amygdalae [L: -21 -7 -15, R: 20 -6 -15]. In addition, we identified  
367 ROIs for more difficult regions, including an ROI proximal to the perirhinal cortex, which we are referring  
368 to more generally as the anterior inferior temporal (AIT [L: -34 -9 -34, R:32 -6 -39]) cortex as well as an  
369 ROI in H-shaped sulcus, which we refer to as the HFA (H-shaped sulcus Face Area, [L: -32 33 -15, R: 30 33  
370 -14]). ROIs identification and all subsequent analyses were carried out in native subject space, but to  
371 compare their locations across participants and to relate these locations to previous studies, we  
372 converted and report their coordinates in MNI space. All cortical regions and their overlap (in the specific  
373 slices selected) across participants are shown in Figure 2A.

374

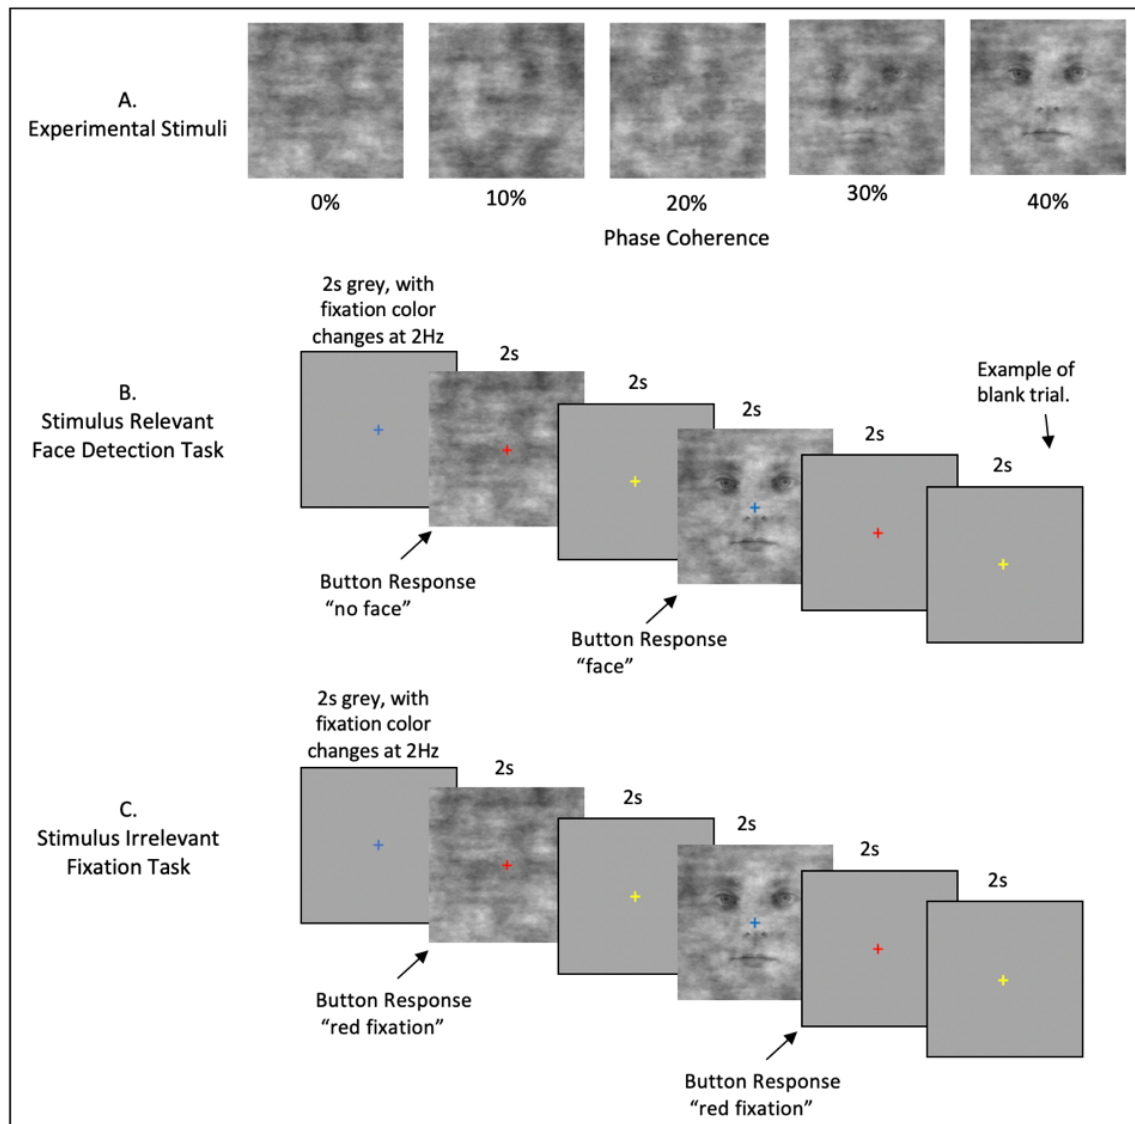

375

376 **Figure 1.** Event Related Stimuli and Tasks. **A)** Example stimuli associated with the 5 phase  
377 coherence levels used. **B)** The Stimulus Relevant Face detection task. Stimuli appeared for 2 seconds,  
378 with an inter-trial interval of 2 seconds. The fixation cross changed color with a frequency of 2Hz and  
379 was visible throughout all experimental procedures. Participants indicated "face" or "no face" using an  
380 MRI response hand pad. Blank trials were randomly inserted during each fMRI run. **C)** The Stimulus  
381 Irrelevant Fixation task. Timing is identical to B. Participants indicated when the fixation cross changed  
382 to the color red.

383

384

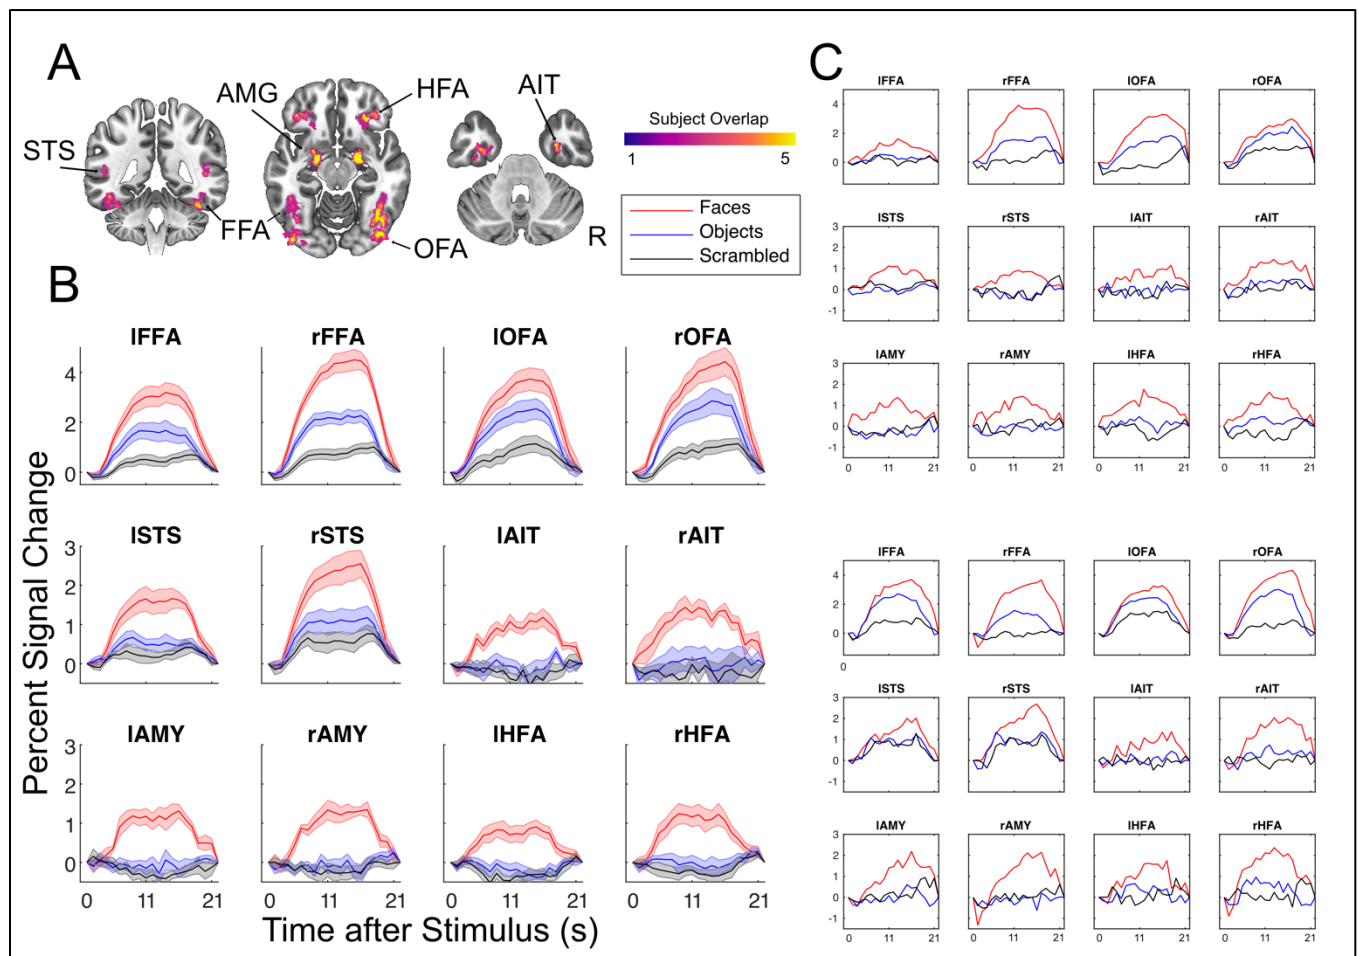

385 **Figure 2.** Results from the face preferential localizer. **A)** All subject's ROIs combined in MNI  
386 template space, highlighting the consistent overlap between subjects and between hemispheres. Labels  
387 indicate ROI names, right is right. **B)** Average BOLD responses across all subjects, in units of percent signal  
388 change, for each ROI in response to faces, objects and scrambled images. Standard Error of the Mean  
389 shown with shading. **C)** Example results from two single subjects showcasing reliability even within a  
390 single subject's ROIs.

391

392 Figure 2B shows ROIs average BOLD time courses, constructed from FIR models. All regions,  
393 including areas associated with low SNR (AIT, HFA), yield plausible hemodynamic responses.  
394 Furthermore, these responses remain HRF-like even at the single subject level (Figure 2C), indicating high  
395 data quality.

396

397 *Behavioral Responses and Ambiguity Scores*

398           The right panel in Figure 3A portrays the face detection group average reaction times. Subjects  
399 responded with an average RT of 760 +/- 120 ms. Reaction times indicate that, in reporting their  
400 percepts, participants were slowest at the lower end of the phase coherence spectrum (i.e. 0% and 10%),  
401 becoming increasingly faster as a function of phase coherence.

402           Figure 3A, left panel, shows the average perceived “faceness”, that is the proportion of the time  
403 that participants reported seeing a face. By calculating the inverse of the absolute distance from the  
404 inflection point (see section 4.4.4.) of the faceness sigmoid, we derive the ambiguity scores (Figure 3A,  
405 middle panel), which peaked at 20% phase coherence. Reaction times were shortest for the highest  
406 phase coherence (Figure 3A, right panel).

407

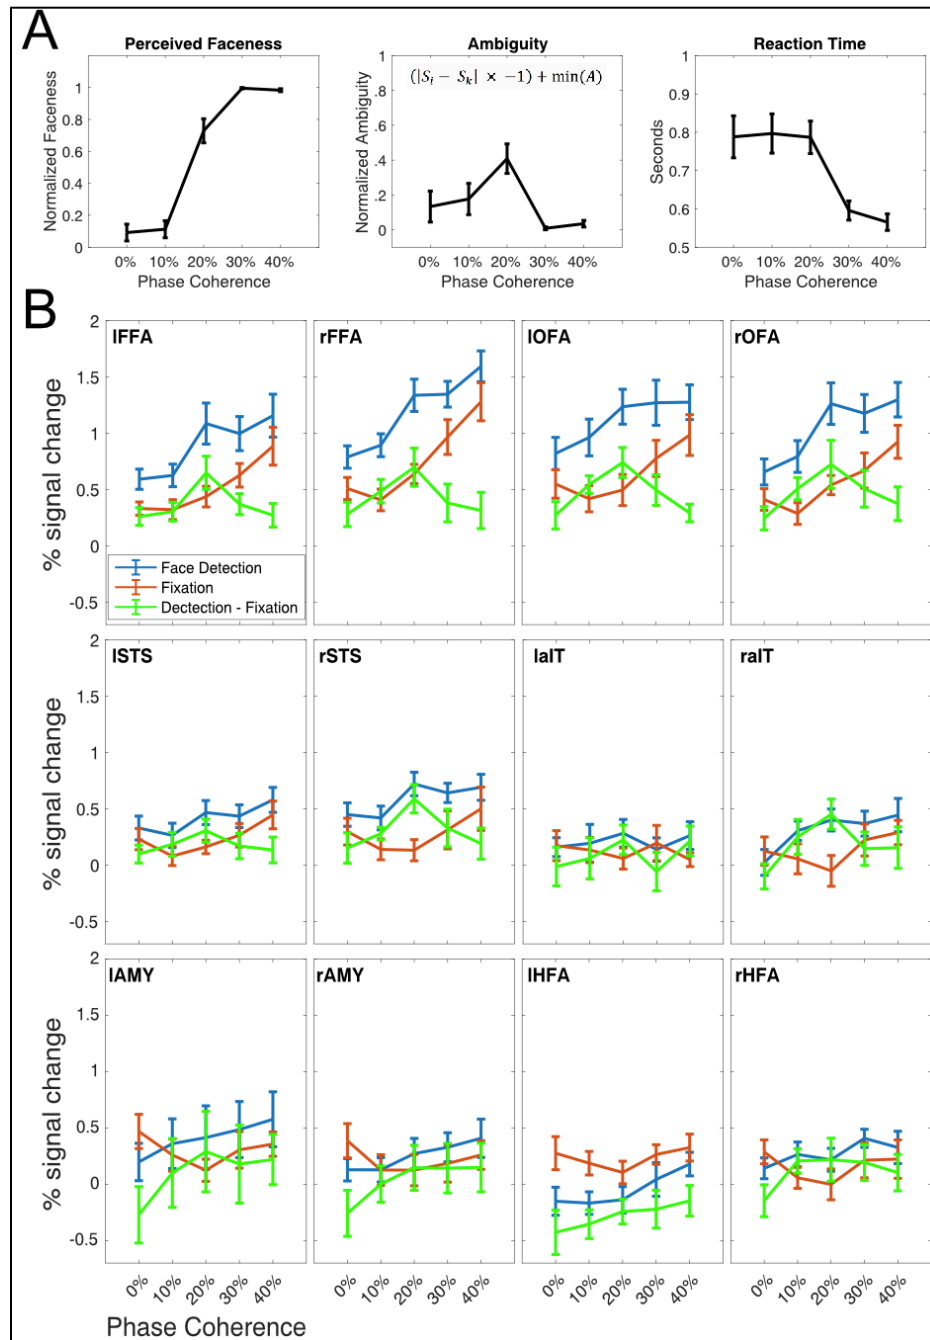

408

409 **Figure 3. A)** Behavioral Responses to Stimulus Relevant Task. **Left panel:** The group average of  
 410 perceived “faceness”, where 0 represents consistently reporting no face, and 1 represents consistently  
 411 reporting the presence of a face. **Central Panel:** The group averaged ambiguity curve, showing that  
 412 stimuli at 20% were most ambiguous, i.e., were most inconsistently categorized. Ambiguity was  
 413 computed according to the equation shown in the middle panel, where  $S_i$  is the  $i$ th point of the faceness  
 414 sigmoid,  $S_k$  is the theoretical midpoint of the faceness sigmoid and  $\min(A)$  is the minimum value of the  
 415 ambiguity function. **Right Panel:** Group averaged reaction times during the face detection task. For all  
 416 panels, error bars represent standard errors across subjects. **B)** Percent Signal change during event  
 417 related tasks in all ROIs. In blue, the BOLD responses to the stimulus relevant, domain specific task, in  
 418 red to the stimulus irrelevant task. For the majority of ROIs, the stimulus relevant BOLD responses are  
 419 larger across all phase levels relative to the stimulus irrelevant task. The green curve represents the  
 420 differences between tasks.

421

## 422 Face and Fixation fMRI analyses

### 423 *ANOVA Results*

424 The subjects mean percent signal change in response to each condition, for each ROI, is shown  
425 in Figure 3B.

426 The main effect of the task was significant ( $p < 0.05$ ) in the IFFA ( $F_{1,9} = 20.559$ ), rFFA ( $F_{1,9} =$   
427  $13.131$ ), IOFA ( $F_{1,9} = 48.595$ ), rOFA ( $F_{1,9} = 14.304$ ) and the rSTS ( $F_{1,9} = 9.182$ ), with face detection driving  
428 larger BOLD responses relative to the fixation task.

429 There was a significant ( $p < 0.05$ ) main effect of the condition (phase coherence level) in the IFFA  
430 ( $F_{4,36} = 13.136$ ), rFFA ( $F_{4,36} = 35.567$ ), IOFA ( $F_{4,36} = 7.56$ ), rOFA ( $F_{4,36} = 22.866$ ), ISTS ( $F_{4,36} = 7.98$ ), rSTS ( $F_{4,36}$   
431  $= 5.637$ ), the rAIT ( $F_{4,36} = 4.174$ ). For these ROIs, paired sample post-hoc t-test ( $p < .05$ , corrected) showed  
432 that the 40% phase coherence is always significantly larger than 0%.

433 There was a significant ( $p < 0.05$ ) task by condition interaction term in the IFFA ( $F_{4,36} = 4.96$ ), rFFA  
434 ( $F_{4,36} = 3.311$ ), the rSTS ( $F_{4,36} = 3.620$ ) and the rAIT ( $F_{4,36} = 3.84$ ), indicating that amplitude increase during  
435 detection relatively to fixation was different for different phase coherence levels. Post-hoc t-tests carried  
436 out across tasks, within each condition revealed that for these ROIs only the 20% phase coherence  
437 conditions were always significantly ( $p < .05$  corrected) larger than all other conditions. The t-values (IFFA  
438 ( $t(9) = 4.407$ ), rFFA ( $t(9) = 4.132$ ), rSTS ( $t(9) = 4.684$ ) and the rAIT ( $t(9) = 3.376$ )) and related effect sizes  
439 (Hedges  $g^*$ : IFFA: 1.361; rFFA: 1.795; rSTS: 1.791; and rAIT: 1.151) further indicate reliable and replicable  
440 effects with the current  $N = 10$ .

441

## 442 *Functional Connectivity Measures*



443 Functional connectivity significantly increased ( $p < 0.05$ , corrected) between multiple areas  
 444 during the face detection task relative to fixation in multiple core face processing areas. Specifically, we  
 445 found significant increases in functional connectivity between the 1) IFFA and the rFFA, right and IOFA,  
 446 rSTS and rAIT, 2) rFFA and rOFA, rSTS and rAIT, 3) the IOFA and the rSTS 4) the rOFA and the rSTS  
 447 (symmetrical connectivity between regions not repeated).

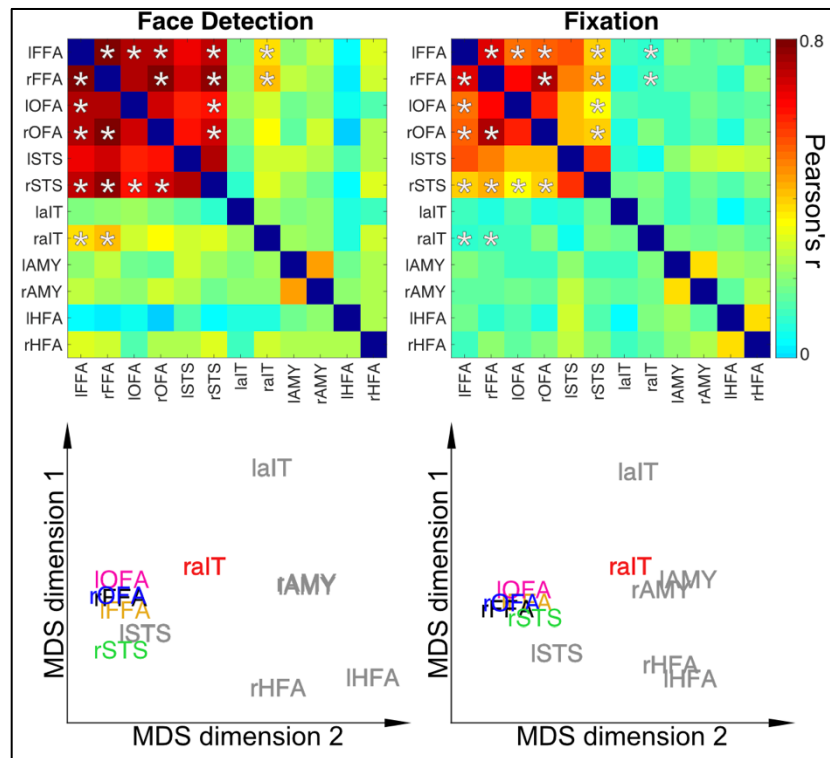

448  
 449 **Figure 4.** Dynamic Reconfiguration of Face Network as a function of Task **Top Row:** Connectivity  
 450 Matrices for Stimulus Relevant Face Detection Task (Left) and Stimulus Irrelevant Fixation Task (Right).  
 451 Asterisks indicate correlation coefficients that significantly ( $p < 0.05$ ) difference between tasks and are  
 452 identical between matrices for visualization purposes. **Bottom Row.** Classic Multidimensional Scaling for  
 453 connectivity matrices highlights the higher proximity of the rAIT to the core face areas as a function of  
 454 increased connectivity during face detection relative to the fixation task. ROIs in grey text indicate those  
 455 regions with no significant connectivity modulations across tasks.

456  
 457 Multidimensional scaling (MDS), which is a dimensionality reduction technique that allows  
 458 visualizing the level of similarity amongst data points, was used to summarize task demands related  
 459 modulations in connectivity. MDS spatial arrangement, where proximity amongst point indicates

460 similarity of responses, highlights how the rAIT is more closely located to the FFAs (i.e. significantly more  
461 correlated) during face detection relative to fixation (see Figure 4 Bottom; multidimensional space of  
462 fixation rotated onto that of detection using Procrustes transformation).

463

#### 464 *Brain-Behavior Correlations*

465 Figure 5A shows the correlation between the ambiguity score and the difference in the measured  
466 brain activity between the stimulus-relevant (SR) and stimulus-irrelevant (SI) tasks. Correlations were  
467 significant ( $p < 0.05$ , corrected) in the bilateral FFA and OFAs and the rAIT.

468

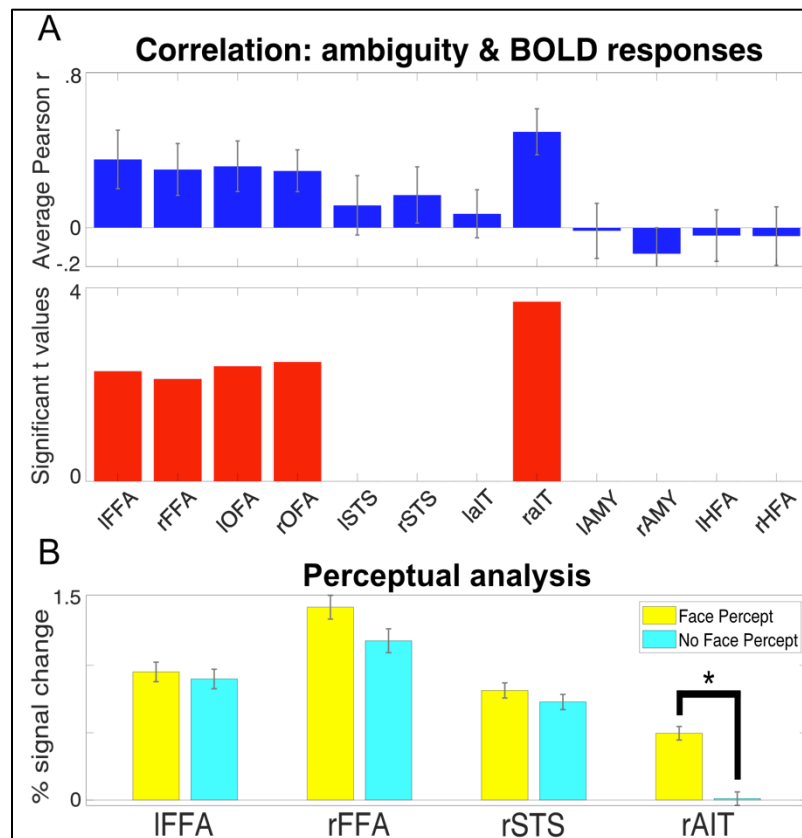

469

470 **Figure 5. A)** Brain-Behavior Correlations in FFAs, OFAs and rAIT. **Top.** The Pearson correlation  
 471 coefficient between the ambiguity score and the difference in task BOLD responses. **Bottom.** For the  
 472 regions reaching significance ( $p < 0.05$ ), the left and right FFAs and OFAs, and rAIT, the t values are  
 473 plotted. **B)** Average BOLD response to 20% phase coherence (i.e. the most ambiguous stimulus) for the  
 474 trials in which participants reported a face percept (yellow) and no face percept (magenta). Responses  
 475 are reported for the regions that showed a significant ( $p < 0.05$  corrected) task by condition interaction.  
 476 Star symbol indicates significantly ( $p < 0.05$  corrected) difference in amplitude.

477

#### 478 *Perceptual analysis*

479 For the 20% phase coherence condition only (i.e. the most ambiguous percept) we further  
 480 separated the activity elicited by each trial according to participants perceptual response, creating 2 new  
 481 conditions: “face percept” and “no face percept”. We investigated amplitude differences between these  
 482 2 conditions for those ROIs that showed a significant task x condition interaction. While all areas showed  
 483 slightly larger BOLD amplitude for the face compared to the non-face percept, paired sample t-tests  
 484 indicated significant amplitude differences as a function of percept in the rAIT only ( $t(9) = 6.365$   $p < .05$ )

485 corrected; see figure 5B). Moreover, paired sample t-tests contrasting the activation of each condition  
486 for all ROIs against 0 further indicated significant ( $p < .05$  corrected) above baseline activation for all ROIs  
487 and conditions, except for the “no face percept” response in the rAIT, which did not significantly differ  
488 from baseline.

489

490

## 491 Discussion

### 492 Task Modulations & Ambiguity

493           Straightforward manipulation of task demands can produce changes in the amplitude of BOLD  
494 response in higher level areas, such as the FFA (Druzgal and D’Esposito, 2001; Kay and Yeatman, 2017;  
495 Vuilleumier et al., 2001; Wojciulik et al., 1998) or STS (Narumoto et al., 2001). Traditionally, however,  
496 these tasks manipulations are often indirectly related to the neural processing of the stimuli at hand, as  
497 they serve a more general purpose of directing attention towards (e.g. N-back) or away from the stimuli  
498 (e.g. fixation tasks, see Bokde et al., 2005; Druzgal and D’Esposito, 2001; Egnér and Hirsch, 2005; Kay and  
499 Yeatman, 2017; Wojciulik et al., 1998). Changes in neural responses to identical visual inputs related to  
500 these unspecific changes in task demands often reveal broad contributions from attentional networks,  
501 including frontal and parietal regions (Szczepanski et al., 2013). While these manipulations can shed light  
502 upon the neural basis of general, non-specific top-down mechanisms, such as awareness, working  
503 memory demands or vigilance, they may fail to reveal fine-grained top-down modulations pertaining to  
504 the processing of a specific stimulus category. The approach used here instead builds on task  
505 manipulations that tap into a relevant stimulus dimension. This disambiguates the contributions of  
506 various regions *within* dedicated networks (here, the face processing network), by modulating the  
507 difficulty within a stimulus relevant task. In the context of this work, we will be referring to the  
508 modulatory forces that direct attention towards (e.g. N-Back) or away from (e.g. observe fixation) the  
509 stimuli as “*non-specific top-down*”; and to the task-specific modulations, as they pertain to task difficulty  
510 or cognitive load, as “*domain-specific top-down*”.

511

512 *Task modulations: differentiating domain-specific vs non-specific top-down*

513 Our finding that the specificity of task-related modulations is dependent on the nature of the  
514 task is consistent with a large body of literature highlighting the conceptual and anatomical differences  
515 between different types of attention. Posner and Peterson (1990) delineated 3 attention subsystems  
516 devoted to orienting, detection, and alertness. *Our results suggest that a design in which domain-*  
517 *specificity difficulty is varied is capable of revealing the distinct modulation associated with different*  
518 *attentional subsystems.* The significant ( $p < .05$  corrected) main effect of task, indicates, in accordance  
519 with previous reports (Druzgal and D’Esposito, 2001; Kay and Yeatman, 2017; Vuilleumier et al., 2001;  
520 Wojciulik et al., 1998) that BOLD amplitude is on average larger during the stimulus relevant (SR) relative  
521 to stimulus irrelevant (SI) task in canonical face processing areas: the bilateral FFA, OFA and the rSTS. In  
522 line with previous work, (Druzgal and D’Esposito, 2001; Kay and Yeatman, 2017; Ress et al., 2000), we  
523 suggest that these increases reflect broad top-down contributions relating to increased vigilance and  
524 awareness of the stimuli, which have previously been shown to improve decoding performance (Dobs  
525 et al., 2018).

526 By contrast, there are a specific subset of areas that show an interaction between task and  
527 stimulus: the bilateral FFA as well as the rAIT and rSTS. Of these only the rAIT showed a significant  
528 interaction, driven by the activity elicited by the 20% phase coherence images being larger during the SR  
529 compared to the SI. This result indicates that, at least within the context of this work, this region’s  
530 responses are *exclusively domain-specific top-down modulations*. In this region in fact, other than for the  
531 20% phase coherence, task demands do not alter BOLD amplitude to any other condition (Figure 3B).

532 Finally, a large number of regions, specifically the FFAs, OFAs, STS, and rAIT showed a main effect  
533 of condition, driven by larger amplitude for the 40% phase relative to the 0% phase. As this comparison  
534 is equivalent to a classical ‘face vs scrambled face’ linear contrast (Chen et al., 2007; Rossion et al., 2012)

535 used to define stimulus selectivity, and consistent with the preferentiality of these regions for this  
536 stimulus category, this result is unsurprising and won't be discussed further.

537

### 538 *Ambiguity*

539 Post-hoc t-tests carried out on the significant task x condition interactions revealed that in all  
540 cortical regions exhibiting specific top-down modulations, the stimulus relevant task amplitude increases  
541 were always significant *only* for 20% phase coherence. Behaviorally, this condition was also found to be  
542 the most perceptually ambiguous, i.e. the condition with the largest reported number of contrasting  
543 percepts (i.e. "face" and "no face"). In the context of this study we mathematically defined ambiguity as  
544 the inverse of the absolute difference from the inflection point of the sigmoid that describes the face  
545 percept/detection behavioral responses (see Equation 1). Both extremes of the phase coherence  
546 continuum therefore represent non-ambiguous percepts. That is, at low phase coherence (e.g. 0%)  
547 participants consistently reported no face percept and at high coherence (40%) participants consistently  
548 reported the presence of a face (Figure 3A). At the maximally ambiguous, 20% condition, the percept  
549 was at its most unstable and thus most difficult to categorize, leading to a larger amplitude response.  
550 This relative increase is consistent with prior work showing that task difficulty can modulate the BOLD  
551 response not only in frontal or parietal regions (Culham et al., 2001; Gould et al., 2003) but also in these  
552 category sensitive visual areas (Druzgal and D'Esposito, 2001).

553 Notably, the reaction times measured in this study do not appear to capture this difficulty  
554 increase (Figure 3A). This disconnect between reaction time and experimental performance has been  
555 noted before in relation to accuracy and attentional cueing (van Ede et al., 2012) or to task difficulty  
556 across a wide range of N-back conditions (Lamichhane et al., 2020). In our data, this likely reflects a

557 disconnect between the idea of “task difficulty” and “difficulty in categorization” which may provide  
558 separate contributions to total reaction time.

559

### 560 *Top-down driven network reconfiguration*

561 To understand how top-down/context modulated the inter-regional neural communication and  
562 thus the connectivity within specialized cortical networks (here, the face network), we compared  
563 functional connectivity between tasks (see paragraph 4.6.2). By computing functional connectivity on  
564 concatenated FIR curves, we: 1) discard the contribution of ongoing activity (which is not the focus of  
565 this specific work); and 2) increase statistical power and thus the reliability of our correlational metric.  
566 Broadly speaking, connectivity was significantly greater in core and extended regions (i.e. between FFAs,  
567 OFAs and rSTS) during the stimulus relevant task, indicating greater communication among these areas,  
568 presumably to fulfill task demands. In particular, we observed significantly ( $p < .05$  corrected) greater  
569 connectivity between the rAIT and the FFAs during the face task relative to the fixation (Figure 4). A  
570 number of studies have suggested a functional differentiation between the right and IFFA (Meng et al.,  
571 2012; Rossion et al., 2000), with the former being more involved in holistic processing and the latter in  
572 featural processing. It is therefore likely that the degraded stimuli used here (Figure 1) drive both  
573 individual feature detection as well as holistic face processing; or that subjects flexibly adapt their  
574 strategy depending on the available information, switching from featural (e.g. looking for eyes) to holistic  
575 detection, thus engaging both FFAs.

576 Within the current experimental settings, our data suggest that, during face processing, the rAIT  
577 can be recruited by the cortical face network to add an additional resource to resolve ambiguous  
578 percepts. These results are consistent with the functional differentiation between core and extended  
579 cortical face networks, according to which the core system mediates the representation of more basic



580 aspects of face processing, while the extended system is involved in higher level cognitive functions and  
581 can be selectively recruited to act in concert with the regions in the core system (Haxby et al., 2000).

582           Moreover, our results suggest that network connectivity is not static, but flexibly adapts to the  
583 contextual demands. This is in line with an ever growing body of literature advocating the plastic nature  
584 of functional connectivity during task and at rest (Allen et al., 2014; Cribben et al., 2013; Debener et al.,  
585 2006; Doucet et al., 2012; Hutchison et al., 2013; Sadaghiani et al., 2009) in response to cognitive and  
586 behavioral demands (Gratton et al., 2018; Hutchison and Morton, 2016). Our results further expand  
587 these views, indicating that even subtle changes in task demands, as those implemented here, can have  
588 a dramatic impact over local network reconfigurations.

589

### 590           *Using Stimulus Ambiguity to Differentiate Functional Architecture*

591           Though it is challenging to establish causality, taken together, our results suggest that the rAIT is  
592 the source of top-down modulation. First, the correlation between the difference of the BOLD signal  
593 between tasks, and each participant's behavior (ambiguity score) was only significant in the bilateral  
594 FFAs and OFAs and the rAIT. By using task differences in BOLD responses to identical stimuli, we sought  
595 to highlight task specific top-down effects. This finding, indicating correspondence between the  
596 ambiguity function and the difference in BOLD amplitude across tasks within these ROIs, suggests that  
597 this ambiguity signal originates from one of these regions. As the rAIT is further along the information  
598 hierarchy, it is the plausible source of this signal. Moreover, functional connectivity analysis shows  
599 increased connectivity between the rAIT and both FFAs, between OFAs and FFAs, but not between the  
600 rAIT and either of the OFAs. In addition, the FFAs show both non-specific (significant main effect of task)  
601 and domain-specific (significant task x condition interaction) top-down effects, while the rAIT shows only  
602 the task-specific, ambiguity related, top-down effects (significant interaction).

603            Though prior work has often implicated frontal regions or parietal areas as being a source for  
604 these top-down signals when detecting objects such as faces or houses (Baldauf and Desimone, 2014;  
605 Kay and Yeatman, 2017), these studies used indirect methods (i.e. 1-back; house or face) to examine  
606 face detection. By manipulating difficulty within the context of face detection, we uncover a different,  
607 within-network source of top-down modulation by directly stressing the face processing system. This  
608 approach is similar to prior work finding modulation within the ventral temporal cortex when viewing  
609 degraded facial stimuli (Fan et al., 2020).

610            Furthermore, there is evidence that the AIT is involved in resolving difficult stimuli in both  
611 macaques and humans. For the former, prior work has implicated this region in learning ambiguous  
612 stimulus rules related to concurrent discrimination (Bussey et al., 2002). Increases in ambiguity were  
613 associated with worse performance in the macaques with perirhinal cortex (i.e. anterior inferior  
614 temporal lobe) lesions. In humans, there is evidence that the AIT is associated with discriminating  
615 individual face identities (Nasr and Tootell, 2012; Zhang et al., 2016), however these studies employed  
616 tasks that did not necessarily tap directly into stimulus-specific dimensions. Though these studies offer  
617 support for our findings, they are unable to disambiguate the relationship between behavior and  
618 perception, as they either used a memory task, in which subjects could have used an image matching  
619 strategy (Nasr and Tootell, 2012), or used only a fixation task (Zhang et al., 2016). Additional evidence  
620 for the involvement of the AIT in ambiguous or difficult stimuli comes from outside the face perception  
621 literature: this area is active when integrating conceptual and perceptual information (Martin et al.,  
622 2018) and it is associated with identifying confusable objects (Clarke and Tyler, 2014; Tyler et al., 2013).  
623 We therefore argue that the results presented here and those reported in previous work represent  
624 indication that the ambiguity-related top-down signal during face detection originates in the rAIT, is fed  
625 back to the FFAs and, from there, to the OFAs. Future work can explicitly assess this using specifically

626 tailored research methods that provide better evidence of causality, such as depth dependent fMRI  
627 analyses (Huber et al., 2017), intracranial EEG or fMRI with dynamic causal modeling (Friston et al., 2019).

628

### 629 *Neural Correlate of Perception*

630 While FFAs and rSTS show both a main effect of task and a task by condition interaction, only the  
631 latter was significant in the rAIT. To better understand these differences and further characterize the  
632 response profile of these regions, we grouped BOLD responses according to each participant's percept  
633 during the most ambiguous condition (i.e. 20% phase coherence). This analysis shows that, *for the rAIT*  
634 *only*, responses elicited by face percepts are significantly larger than those elicited by no face percepts  
635 (Figure 5B), indicating a high correspondence between neural and behavioral responses. Moreover,  
636 unlike FFAs and rSTS, showing significant above baseline activation for the no face percept condition,  
637 the rAIT shows no significant activation when participants failed to perceive a face (Figure 5B). Taken  
638 together, these findings represent evidence for a direct link between the rAIT and subjective perception.  
639 These observations are consistent with the idea that anterior temporal regions are involved in subjective  
640 awareness (Li et al., 2014) and with reports that the AIT organizes visual objects according to their  
641 semantic interpretations (Price et al., 2017). These findings are also consistent with the data from the  
642 face localizer (Figure 1) in which the rAIT shows the most preferential face response amongst these 4  
643 regions, with objects and scrambled images not being significantly different from zero. These effects  
644 were not found for the lAIT, suggesting a possible lateralization of these processes in humans. However,  
645 in light of the low and inconsistent responses in lAIT, we advocate caution in interpreting these results.  
646 Further work is therefore required to characterize the functional role of this and other areas (i.e. HFAs  
647 and amygdalae) that displayed comparable responses.

648           The significant activation for the no face percept condition in the FFAs and rSTS can be related to  
649 the bottom-up physical properties of the stimulus: regardless of the perceptual state, the 20% phase  
650 coherence images always contained a face stimulus. Alternatively, this result can be due to the  
651 contextual top-down induced by task demands (here a face detection task). That is, as tasks were blocked  
652 by run, during SR runs, participants expected having to resolve perceptual judgment of an ambiguous  
653 stimulus, and therefore looked for a face or a face feature in every trial. This is consistent with the  
654 observation that, in the absence of a face, the FFA can be activated from contextual cues alone (Cox et  
655 al., 2004).

656           Past work using ambiguous facial stimuli in the form of Mooney faces (Mooney, 1957)  
657 have found amplitude differences in the FFA (Andrews and Schluppeck, 2004) or latency differences in  
658 the rOFA (Fan et al., 2020). Alternative approaches using bistable perception, such as the face/vase  
659 illusion also report that the FFA shows greater activation when faces are perceived (Andrews et al., 2002;  
660 Hasson et al., 2001). With binocular rivalry, in which alternative images are shown to each eye, the FFA  
661 also increases in activity when faces are perceived (Tong et al., 1998). In our present work we found that  
662 the FFA did show a larger, however, non-significant increase when subjects reported seeing a face. This  
663 apparent discrepancy with prior reports can be explained by differences in experimental paradigms.  
664 Unlike Mooney faces, or face-related bistable stimuli, the 20% phase coherence stimuli used here always  
665 have a physical face present. For binocular rivalry, the perceptual ambiguity is similar to bistable  
666 perception, however binocular rivalry is ecologically implausible. The defining characteristic of these  
667 probes is a dynamic switching amongst percepts despite identical visual input. Here, we have instead  
668 focused on the ambiguity of the initial percept, which is more similar to approaches using degraded or  
669 partially occluded static stimuli (Flounders et al., 2019; Frühholz et al., 2011). With our stimuli and  
670 experimental manipulations, *we isolate a unique and distinctive signal only in the rAIT that distinguishes*  
671 *the subjective perception of a face.*

672 Another important implication of the findings presented is their interpretation in relation to non-  
673 human primate research. Similar to humans, macaque monkeys possess a specialized cortical network  
674 in inferotemporal cortex dedicated to processing faces (e.g. Tsao et al., 2003), however the exact  
675 correspondence between human and macaque face-selective areas is still unclear (Tsao et al., 2008a,  
676 2006, 2003). While a degree of structural and functional correspondence has been achieved with regards  
677 to the core regions (e.g. macaque middle face patches to human FFA (Rajimehr et al., 2009; Tsao et al.,  
678 2008a)), identifying a human homologue of the macaque anterior medial (AM) patch (the anterior most  
679 patch) has been challenging. Tsao, Moeller, et al. (2008a) for example, failed to uncover a comparable  
680 region in humans, attributing such failure to susceptibility related signal drop out due the putative  
681 proximity of this area to the ear canal. Rajimehr and colleagues (Rajimehr et al., 2009) uncovered a face  
682 specific region in human AIT in 5 out of 10 participants, but were unable to elucidate the nature of its  
683 response properties. Here not only were we able to identify a human face selective region in AIT in all  
684 subjects, but, importantly, we were able to define its response profile. Our results, linking the function  
685 of the face AIT to subjective perception, are in line with recent electrophysiology reports, showing that  
686 activity in the AM face patch is related to the animal's individual ability to detect a face (Moeller et al.,  
687 2017).

688

### 689 *Benefits of High Field Imaging*

690 As briefly mentioned in the above paragraph, much of the difficulty in imaging regions such as  
691 the AIT relates to low SNR associated because of susceptibility artifacts and inefficient RF transmit fields  
692 in the ventral temporal lobes (Devlin et al., 2000). Moreover, areas such as the AIT are typically difficult  
693 to image at more conventional (3T) field strengths due to low signal and are often not located in every  
694 individual (e.g. 50% in Rajimehr et al., 2009), and often show large deviation from expected

695 hemodynamic responses (e.g. Ramon et al., 2015). These issues can persist independent of field  
696 strength.

697 Here we used UHF fMRI to capitalize on higher SNR, CNR, and acceleration performance  
698 maximizing fMRI sensitivity in these regions. It should be noted that moving to higher field alone is not  
699 sufficient to guarantee increased image quality in these regions. At UHF, while BOLD signal changes and  
700 SNR do increase, B0 and B1+ inhomogeneity also increase and have to be dealt with. Here the  
701 combination of our experimental design, rigorous analytical approach, manual B0 shimming tailored to  
702 all participants with a specific focus on anterior ventral temporal regions and flip angle optimizations  
703 (see methods) yielded fruitful results. *For all our participants* we report consistent and corresponding  
704 regions in the anterior inferior temporal cortex on both the left and right that preferentially respond to  
705 faces and that are modulated by task demands. This increased sensitivity that led to large effect size and  
706 ROI identification in all subjects, stems from a combination of parameters and sequence optimization.  
707 Specifically, in addition to the increased SNR that accompanies UHF strength, unlike 3T acquisitions,  
708 where no effort has been put forward to for optimizing B0 and flip angles, we manually adjusted B0  
709 inhomogeneity and flip angles to maximize SNR for each subject. Moreover, relative to previous human  
710 work, where functional voxels measured > 3 mm iso (e.g. (Rajimehr et al., 2009; Ramon et al., 2015)),  
711 here, we used 1.6 mm iso voxels, minimizing partial volume effects and spin dephasing, ultimately  
712 reducing signal loss in dropout regions (Thanh Vu et al., 2017). While the increased signal due to higher  
713 field strengths can be a benefit, using high field alone is insufficient and can be, in fact, at times  
714 detrimental. Appropriate consideration of tradeoffs, such as increased B0/B1+ instability, is necessary.

715

716 *Beyond the ventral temporal lobe: future directions*

717           Beyond the ventral temporal lobe, there have been reports of face sensitive regions in lateral  
718 orbital regions in macaques (Barat et al., 2018; Hadj-Bouziane et al., 2008; Tsao et al., 2008b). However,  
719 evidence for the existence of these areas in humans has been mixed, uncovering such regions in  
720 approximately half (Troiani et al., 2016) or one-third of the study population (Troiani et al., 2019; Tsao  
721 et al., 2008a). In the current work, we are able to identify these areas in all subjects during the localizer  
722 portion of the study. Activation was proximal to the H-Shaped sulci, consistent with both prior reports  
723 (Troiani et al., 2019) and across subjects, as visualized after normalization to MNI space (Figure 2). Like  
724 the other ROIs in the face preferential cortical network, these regions exhibited positive responses to  
725 faces and significantly ( $p < .05$ ) greater activity to faces relative to scrambled stimuli or objects (See  
726 Methods).

727           Although we did not observe meaningful stimulus relevant task modulations we did observe an  
728 interesting, although non-significant, separation of 2 areas, with regard to their functional connectivity  
729 during face detection: the rHFA exhibited a non-significant increase in activation, while its left  
730 counterpart exhibited a non-significant decrease. These results should be interpreted with caution, as  
731 the primary tasks produced low response amplitudes relative to the localizer. The absence of strong  
732 activation in the HFAs, as well as other regions such as the amygdalae and left AIT, during the primary  
733 task despite prominent responses in the localizer task is likely due to a number of differences between  
734 the tasks. These include, but are not limited to, difference in presentation timings (i.e. 12 secs vs. 2 secs  
735 on/off) and the fact that the localizer used stimulus presentations with non-degraded, full faces with  
736 variable expressions and gaze directions.

737           That these task differences drove larger responses during the localizer task in the HFAs is  
738 congruent with prior findings, namely that these areas have been suggested to be involved in social and  
739 emotional aspects of face processing in non-human primates (Barat et al., 2018), aspects that, within the

740 primary task context, are irrelevant. Our failure to find task modulations is therefore consistent with the  
741 more complex evaluative role of the frontal cortices (Noonan et al., 2012) and its engagement in social  
742 perception tasks (Barat et al., 2018; Beer et al., 2006; Freeman et al., 2010; Mah et al., 2004).

743           Given the enlarged frontal cortices among primate species and in particular the highly developed  
744 frontal areas in humans, it will be essential to perform further research that build on these differences  
745 and further manipulate context, value and/or salience in order to elucidate the functional role of regions  
746 such as the HFAs during face perception and processing.

747



## 748 **Conclusion**

749           Using faces, a well-studied stimulus underpinned by a dedicated, complex cortical network, in  
750 this study we combined high SNR fMRI with domain-specific attention and observed 2 types of top-down  
751 scaling mechanisms: 1) a broad gain effect related to drawing attention to the stimuli, manifesting as an  
752 unspecific amplitude increase across conditions; and 2) an additional scaling of specific conditions  
753 dictated by domain-specific task requirements. We explain the latter in terms of perceptual ambiguity  
754 and suggest that the ambiguity signal originates in the rAIT. Importantly, only in the rAIT is both  
755 preferentially active under challenging conditions and predictive of the subjects' perceptual judgments.  
756 We further show that subtle changes in task demands can lead to dramatic changes in network  
757 reconfigurations. Our results suggest that the combination of an explicit face detection and stimulus  
758 matched control task with low noise fMRI capable of resolving previously inaccessible regions of the  
759 human brain may be the only way to understand the changes underlying human cognitive flexibility

760

761

## 762 **Acknowledgments**

763 Funding for this study was provided by National Institutes of Health Grants RF1 MH117015  
764 (Ghose), RF1 MH116978 (Yacoub), and P30 NS076408 (Ugurbil). The authors would also like to thank Dr.  
765 Kendrick Kay for conceptual discussions regarding stimulus ambiguity and feedback.

766

767

## 768 **Competing Interests**

769           The authors have no financial or non-financial competing interests associated with this work.

## 770 **References**

- 771
- 772 Alexander GE, DeLong MR, Strick PL. 1986. Parallel Organization of Functionally Segregated Circuits  
773 Linking Basal Ganglia and Cortex. *Annu Rev Neurosci* **9**:357–381.  
774 doi:10.1146/annurev.ne.09.030186.002041
- 775 Allen EA, Damaraju E, Plis SM, Erhardt EB, Eichele T, Calhoun VD. 2014. Tracking whole-brain connectivity  
776 dynamics in the resting state. *Cereb Cortex* **24**:663–676. doi:10.1093/cercor/bhs352
- 777 Andrews TJ, Schluppeck D. 2004. Neural responses to Mooney images reveal a modular representation  
778 of faces in human visual cortex. *Neuroimage* **21**:91–98. doi:10.1016/j.neuroimage.2003.08.023
- 779 Andrews TJ, Schluppeck D, Homfray D, Matthews P, Blakemore C. 2002. Activity in the Fusiform Gyrus  
780 Predicts Conscious Perception of Rubin’s Vase–Face Illusion. *Neuroimage* **17**:890–901.  
781 doi:10.1006/nimg.2002.1243
- 782 Arcaro MJ, Livingstone MS. 2017. Retinotopic organization of scene areas in macaque inferior temporal  
783 cortex. *J Neurosci* **37**:7373–7389. doi:10.1523/JNEUROSCI.0569-17.2017
- 784 Baldauf D, Desimone R. 2014. Neural mechanisms of object-based attention. *Science (80- )* **344**:424–427.  
785 doi:10.1126/science.1247003
- 786 Barat E, Wirth S, Duhamel JR. 2018. Face cells in orbitofrontal cortex represent social categories. *Proc*  
787 *Natl Acad Sci U S A* **115**:E111158–E111167. doi:10.1073/pnas.1806165115
- 788 Bassett DS, Wymbs NF, Porter MA, Mucha PJ, Carlson JM, Grafton ST. 2011. Dynamic reconfiguration of  
789 human brain networks during learning. *Proc Natl Acad Sci U S A* **108**:7641–7646.  
790 doi:10.1073/pnas.1018985108

- 791 Beer JS, John OP, Scabini D, Knight RT. 2006. Orbitofrontal cortex and social behavior: Integrating self-  
792 monitoring and emotion-cognition interactions. *J Cogn Neurosci* **18**:871–879.  
793 doi:10.1162/jocn.2006.18.6.871
- 794 Bokde ALW, Dong W, Born C, Leinsinger G, Meindl T, Teipel SJ, Reiser M, Hampel H. 2005. Task difficulty  
795 in a simultaneous face matching task modulates activity in face fusiform area. *Cogn Brain Res*  
796 **25**:701–710. doi:10.1016/j.cogbrainres.2005.09.016
- 797 Bussey TJ, Saksida LM, Murray EA. 2002. Perirhinal cortex resolves feature ambiguity in complex visual  
798 discriminations. *Eur J Neurosci* **15**:365–374. doi:10.1046/j.0953-816x.2001.01851.x
- 799 Chen CC, Kao KLC, Tyler CW. 2007. Face configuration processing in the human brain: The role of  
800 symmetry. *Cereb Cortex* **17**:1423–1432. doi:10.1093/cercor/bhl054
- 801 Chen NK, Dickey CC, Yoo SS, Guttmann CRG, Panych LP. 2003. Selection of voxel size and slice orientation  
802 for fMRI in the presence of susceptibility field gradients: Application to imaging of the amygdala.  
803 *Neuroimage* **19**:817–825. doi:10.1016/S1053-8119(03)00091-0
- 804 Clarke A, Tyler LK. 2014. Object-specific semantic coding in human perirhinal cortex. *J Neurosci* **34**:4766–  
805 4775. doi:10.1523/JNEUROSCI.2828-13.2014
- 806 Cohen MR, Maunsell JHR. 2011. Using Neuronal Populations to Study the Mechanisms Underlying Spatial  
807 and Feature Attention. *Neuron* **70**:1192–1204. doi:10.1016/j.neuron.2011.04.029
- 808 Cox D, Meyers E, Sinha P. 2004. Contextually Evoked Object-Specific Responses in Human Visual Cortex.  
809 *Science (80- )* **304**:115–117. doi:10.1126/science.1093110
- 810 Cox RW. 1996. AFNI: Software for analysis and visualization of functional magnetic resonance  
811 neuroimages. *Comput Biomed Res* **29**:162–173. doi:10.1006/cbmr.1996.0014

- 812 Cribben I, Wager TD, Lindquist MA. 2013. Detecting functional connectivity change points for single-  
813 subject fMRI data. *Front Comput Neurosci* **7**. doi:10.3389/fncom.2013.00143
- 814 Culham JC, Cavanagh P, Kanwisher NG. 2001. Attention response functions: Characterizing brain areas  
815 using fMRI activation during parametric variations of attentional load. *Neuron* **32**:737–745.  
816 doi:10.1016/S0896-6273(01)00499-8
- 817 Cumming G. 2012. Understanding the new statistics: Effect sizes, confidence intervals, and meta-  
818 analysis, Understanding the new statistics: Effect sizes, confidence intervals, and meta-analysis.  
819 New York, NY, US: Routledge/Taylor & Francis Group.
- 820 Dale AM, Fischl B, Sereno MI. 1999. Cortical Surface-Based Analysis. *Neuroimage* **9**:179–194.  
821 doi:10.1006/nimg.1998.0395
- 822 De Martino F, Moerel M, Ugurbil K, Goebel R, Yacoub E, Formisano E. 2015. Frequency preference and  
823 attention effects across cortical depths in the human primary auditory cortex. *Proc Natl Acad Sci U*  
824 *S A* **112**:16036–16041. doi:10.1073/pnas.1507552112
- 825 Debener S, Ullsperger M, Siegel M, Engel AK. 2006. Single-trial EEG-fMRI reveals the dynamics of  
826 cognitive function. *Trends Cogn Sci* **10**:558–563. doi:10.1016/j.tics.2006.09.010
- 827 Desimone R, Albright TD, Gross CG, Bruce C. 1984. Stimulus-selective properties of inferior temporal  
828 neurons in the macaque. *J Neurosci* **4**:2051–2062. doi:10.1523/jneurosci.04-08-02051.1984
- 829 Devlin JT, Russell RP, Davis MH, Price CJ, Wilson J, Moss HE, Matthews PM, Tyler LK. 2000. Susceptibility-  
830 induced loss of signal: Comparing PET and fMRI on a semantic task. *Neuroimage* **11**:589–600.  
831 doi:10.1006/nimg.2000.0595
- 832 Dobs K, Schultz J, Bühlhoff I, Gardner JL. 2018. Task-dependent enhancement of facial expression and

- 833 identity representations in human cortex. *Neuroimage* **172**:689–702.  
834 doi:10.1016/j.neuroimage.2018.02.013
- 835 Doucet G, Naveau M, Petit L, Zago L, Crivello F, Jobard G, Delcroix N, Mellet E, Tzourio-Mazoyer N,  
836 Mazoyer B, Joliot M. 2012. Patterns of hemodynamic low-frequency oscillations in the brain are  
837 modulated by the nature of free thought during rest. *Neuroimage* **59**:3194–3200.  
838 doi:10.1016/j.neuroimage.2011.11.059
- 839 Druzgal TJ, D’Esposito M. 2003. Dissecting contributions of prefrontal cortex and fusiform face area to  
840 face working memory. *J Cogn Neurosci* **15**:771–784. doi:10.1162/089892903322370708
- 841 Druzgal TJ, D’Esposito M. 2001. Activity in fusiform face area modulated as a function of working memory  
842 load. *Cogn Brain Res* **10**:355–364. doi:10.1016/S0926-6410(00)00056-2
- 843 Egner T, Hirsch J. 2005. Cognitive control mechanisms resolve conflict through cortical amplification of  
844 task-relevant information. *Nat Neurosci* **8**:1784–1790. doi:10.1038/nn1594
- 845 Fan X, Wang F, Shao H, Zhang P, He S. 2020. The bottom-up and top-down processing of faces in the  
846 human occipitotemporal cortex. *Elife* **9**. doi:10.7554/eLife.48764
- 847 Farzaneh F, Riederer SJ, Pelc NJ. 1990. Analysis of T2 limitations and off-resonance effects on spatial  
848 resolution and artifacts in echo-planar imaging. *Magn Reson Med* **14**:123–139.  
849 doi:10.1002/mrm.1910140112
- 850 Felleman DJ, Van Essen DC. 1991. Distributed hierarchical processing in the primate cerebral cortex.  
851 *Cereb Cortex* **1**:1–47. doi:10.1093/cercor/1.1.1
- 852 Fischl B, Liu A, Dale AM. 2001. Automated manifold surgery: Constructing geometrically accurate and  
853 topologically correct models of the human cerebral cortex. *IEEE Trans Med Imaging* **20**:70–80.

- 854        doi:10.1109/42.906426
- 855    Fischl B, Salat DH, Busa E, Albert M, Dieterich M, Haselgrove C, Van Der Kouwe A, Killiany R, Kennedy D,  
856        Klaveness S, Montillo A, Makris N, Rosen B, Dale AM. 2002. Whole brain segmentation: Automated  
857        labeling of neuroanatomical structures in the human brain. *Neuron* **33**:341–355.  
858        doi:10.1016/S0896-6273(02)00569-X
- 859    Fischl B, Van Der Kouwe A, Destrieux C, Halgren E, Ségonne F, Salat DH, Busa E, Seidman LJ, Goldstein J,  
860        Kennedy D, Caviness V, Makris N, Rosen B, Dale AM. 2004. Automatically Parcellating the Human  
861        Cerebral Cortex. *Cereb Cortex* **14**:11–22. doi:10.1093/cercor/bhg087
- 862    Fisher RA. 1915. Frequency Distribution of the Values of the Correlation Coefficient in Samples from an  
863        Indefinitely Large Population. *Biometrika* **10**:507. doi:10.2307/2331838
- 864    Flounders MW, González-García C, Hardstone R, He BJ. 2019. Neural dynamics of visual ambiguity  
865        resolution by perceptual prior. *Elife* **8**. doi:10.7554/eLife.41861
- 866    Freeman JB, Rule NO, Adams RB, Ambady N. 2010. The neural basis of categorical face perception:  
867        Graded representations of face gender in fusiform and orbitofrontal cortices. *Cereb Cortex*  
868        **20**:1314–1322. doi:10.1093/cercor/bhp195
- 869    Freeman PR, Hedges L V., Olkin I, Freeman PR, Hedges L V., Olkin I, Rosenbaum PR, Hedges L V., Olkin I,  
870        Freeman PR, Hedges L V., Olkin I. 1986. Statistical Methods for Meta-Analysis., Biometrics.  
871        Academic Press. doi:10.2307/2531069
- 872    Friston KJ, Preller KH, Mathys C, Cagnan H, Heinzle J, Razi A, Zeidman P. 2019. Dynamic causal modelling  
873        revisited. *Neuroimage* **199**:730–744. doi:10.1016/j.neuroimage.2017.02.045
- 874    Frühholz S, Godde B, Lewicki P, Herzmann C, Herrmann M. 2011. Face recognition under ambiguous



- 875 visual stimulation: fMRI correlates of “encoding styles.” *Hum Brain Mapp* **32**:1750–1761.  
876 doi:10.1002/hbm.21144
- 877 Gonzalez-Castillo J, Bandettini PA. 2018. Task-based dynamic functional connectivity: Recent findings  
878 and open questions. *Neuroimage* **180**:526–533. doi:10.1016/j.neuroimage.2017.08.006
- 879 Gould RL, Brown RG, Owen AM, Ffytche DH, Howard RJ. 2003. fMRI BOLD response to increasing task  
880 difficulty during successful paired associates learning. *Neuroimage* **20**:1006–1019.  
881 doi:10.1016/S1053-8119(03)00365-3
- 882 Gratton C, Laumann TO, Nielsen AN, Greene DJ, Gordon EM, Gilmore AW, Nelson SM, Coalson RS, Snyder  
883 AZ, Schlaggar BL, Dosenbach NUF, Petersen SE. 2018. Functional Brain Networks Are Dominated by  
884 Stable Group and Individual Factors, Not Cognitive or Daily Variation. *Neuron* **98**:439-452.e5.  
885 doi:10.1016/j.neuron.2018.03.035
- 886 Grill-Spector K, Weiner KS. 2014. The functional architecture of the ventral temporal cortex and its role  
887 in categorization. *Nat Rev Neurosci* **15**:536–548. doi:10.1038/nrn3747
- 888 Hadj-Bouziane F, Bell AH, Knusten TA, Ungerleider LG, Tootell RBH. 2008. Perception of emotional  
889 expressions is independent of face selectivity in monkey inferior temporal cortex. *Proc Natl Acad*  
890 *Sci U S A* **105**:5591–5596. doi:10.1073/pnas.0800489105
- 891 Handwerker DA, Ollinger JM, D’Esposito M. 2004. Variation of BOLD hemodynamic responses across  
892 subjects and brain regions and their effects on statistical analyses. *Neuroimage* **21**:1639–1651.  
893 doi:10.1016/j.neuroimage.2003.11.029
- 894 Hasson U, Hendler T, Bashat D Ben, Malach R. 2001. Vase or face? A neural correlate of shape-selective  
895 grouping processes in the human brain. *J Cogn Neurosci* **13**:744–753.  
896 doi:10.1162/08989290152541412

- 897 Haxby J V., Gobbini MI, Furey ML, Ishai A, Schouten JL, Pietrini P. 2001. Distributed and overlapping  
898 representations of faces and objects in ventral temporal cortex. *Science (80- )* **293**:2425–2430.  
899 doi:10.1126/science.1063736
- 900 Haxby J V., Hoffman EA, Gobbini MI. 2000. The distributed human neural system for face perception.  
901 *Trends Cogn Sci* **4**:223–233. doi:10.1016/S1364-6613(00)01482-0
- 902 Hedges L V. 1981. Distribution Theory for Glass’s Estimator of Effect Size and Related Estimators. *J Educ*  
903 *Stat* **6**:107. doi:10.2307/1164588
- 904 Hubel DH, Wiesel TN. 1959. Receptive fields of single neurones in the cat’s striate cortex. *J Physiol*  
905 **148**:574–591. doi:10.1113/jphysiol.1959.sp006308
- 906 Huber L, Handwerker DA, Jangraw DC, Chen G, Hall A, Stüber C, Gonzalez-Castillo J, Ivanov D, Marrett S,  
907 Guidi M, Goense J, Poser BA, Bandettini PA. 2017. High-Resolution CBV-fMRI Allows Mapping of  
908 Laminar Activity and Connectivity of Cortical Input and Output in Human M1. *Neuron* **96**:1253–  
909 1263.e7. doi:10.1016/j.neuron.2017.11.005
- 910 Hutchison RM, Morton JB. 2016. It’s a matter of time: Reframing the development of cognitive control  
911 as a modification of the brain’s temporal dynamics. *Dev Cogn Neurosci*, Flux Congress 2014 **18**:70–  
912 77. doi:10.1016/j.dcn.2015.08.006
- 913 Hutchison RM, Womelsdorf T, Gati JS, Everling S, Menon RS. 2013. Resting-state networks show dynamic  
914 functional connectivity in awake humans and anesthetized macaques. *Hum Brain Mapp* **34**:2154–  
915 2177. doi:10.1002/hbm.22058
- 916 Kabbara A, EL Falou W, Khalil M, Wendling F, Hassan M. 2017. The dynamic functional core network of  
917 the human brain at rest. *Sci Rep* **7**:2936. doi:10.1038/s41598-017-03420-6

- 918 Kanwisher N, McDermott J, Chun MM. 1997. The fusiform face area: A module in human extrastriate  
919 cortex specialized for face perception. *J Neurosci* **17**:4302–4311. doi:10.1523/jneurosci.17-11-  
920 04302.1997
- 921 Kanwisher N, Yovel G. 2006. The fusiform face area: A cortical region specialized for the perception of  
922 faces. *Philos Trans R Soc B Biol Sci* **361**:2109–2128. doi:10.1098/rstb.2006.1934
- 923 Kay KN, Yeatman JD. 2017. Bottom-up and top-down computations in word- and face-selective cortex.  
924 *Elife* **6**:e22341. doi:10.7554/eLife.22341
- 925 Lakens D. 2013. Calculating and reporting effect sizes to facilitate cumulative science: A practical primer  
926 for t-tests and ANOVAs. *Front Psychol* **4**:863. doi:10.3389/fpsyg.2013.00863
- 927 Lamichhane B, Westbrook A, Cole MW, Braver TS. 2020. Exploring brain-behavior relationships in the N-  
928 back task. *Neuroimage* **212**:116683. doi:10.1016/j.neuroimage.2020.116683
- 929 Laughlin SB, Sejnowski TJ. 2003. Communication in neuronal networks. *Science (80- )* **301**:1870–1874.  
930 doi:10.1126/science.1089662
- 931 Leung AWS, Alain C. 2011. Working memory load modulates the auditory “What” and “Where” neural  
932 networks. *Neuroimage* **55**:1260–1269. doi:10.1016/j.neuroimage.2010.12.055
- 933 Lewis LD, Setsompop K, Rosen BR, Polimeni JR. 2018. Stimulus-dependent hemodynamic response  
934 timing across the human subcortical-cortical visual pathway identified through high spatiotemporal  
935 resolution 7T fMRI. *Neuroimage* **181**:279–291. doi:10.1016/j.neuroimage.2018.06.056
- 936 Li Q, Hill Z, He BJ. 2014. Spatiotemporal dissociation of brain activity underlying subjective awareness,  
937 objective performance and confidence. *J Neurosci* **34**:4382–4395. doi:10.1523/JNEUROSCI.1820-  
938 13.2014

- 939 Li X, Morgan PS, Ashburner J, Smith J, Rorden C. 2016. The first step for neuroimaging data analysis:  
940 DICOM to NIfTI conversion. *J Neurosci Methods* **264**:47–56. doi:10.1016/j.jneumeth.2016.03.001
- 941 Liu B, Zhu T, Zhong J. 2015. Comparison of quality control software tools for diffusion tensor imaging.  
942 *Magn Reson Imaging* **33**:276–285. doi:10.1016/j.mri.2014.10.011
- 943 Mah L, Arnold MC, Grafman J. 2004. Impairment of social perception associated with lesions of the  
944 prefrontal cortex. *Am J Psychiatry* **161**:1247–1255. doi:10.1176/appi.ajp.161.7.1247
- 945 Martin CB, Douglas D, Newsome RN, Man LLY, Barense MD. 2018. Integrative and distinctive coding of  
946 visual and conceptual object features in the ventral visual stream. *Elife* **7**:e31873.  
947 doi:10.7554/eLife.31873
- 948 Martinez-Trujillo JC, Treue S. 2004. Feature-based attention increases the selectivity of population  
949 responses in primate visual cortex. *Curr Biol* **14**:744–751. doi:10.1016/j.cub.2004.04.028
- 950 McCarthy G, Puce A, Gore JC, Allison T. 1997. Face-specific processing in the human fusiform gyrus. *J*  
951 *Cogn Neurosci* **9**:605–610. doi:10.1162/jocn.1997.9.5.605
- 952 Meng M, Cherian T, Singal G, Sinha P. 2012. Lateralization of face processing in the human brain. *Proc R*  
953 *Soc B Biol Sci* **279**:2052–2061. doi:10.1098/rspb.2011.1784
- 954 Moeller S, Crago T, Chang L, Tsao DY. 2017. The effect of face patch microstimulation on perception of  
955 faces and objects. *Nat Neurosci* **20**:743–752. doi:10.1038/nn.4527
- 956 Moeller S, Freiwald WA, Tsao DY. 2008. Patches with links: A unified system for processing faces in the  
957 macaque temporal lobe. *Science (80- )* **320**:1355–1359. doi:10.1126/science.1157436
- 958 Mooney CM. 1957. Age in the development of closure ability in children. *Can J Psychol* **11**:219–226.  
959 doi:10.1037/h0083717

- 960 Narumoto J, Okada T, Sadato N, Fukui K, Yonekura Y. 2001. Attention to emotion modulates fMRI activity  
961 in human right superior temporal sulcus. *Cogn Brain Res* **12**:225–231. doi:10.1016/S0926-  
962 6410(01)00053-2
- 963 Nasr S, Tootell RBH. 2012. Role of fusiform and anterior temporal cortical areas in facial recognition.  
964 *Neuroimage* **63**:1743–1753. doi:10.1016/j.neuroimage.2012.08.031
- 965 Noonan MP, Kolling N, Walton ME, Rushworth MFS. 2012. Re-evaluating the role of the orbitofrontal  
966 cortex in reward and reinforcement. *Eur J Neurosci* **35**:997–1010. doi:10.1111/j.1460-  
967 9568.2012.08023.x
- 968 Olman CA, Davachi L, Inati S. 2009. Distortion and signal loss in medial temporal lobe. *PLoS One* **4**.  
969 doi:10.1371/journal.pone.0008160
- 970 Parker AJ, Newsome WT. 1998. SENSE AND THE SINGLE NEURON: Probing the Physiology of Perception.  
971 *Annu Rev Neurosci* **21**:227–277. doi:10.1146/annurev.neuro.21.1.227
- 972 Perrett DI, Rolls ET, Caan W. 1982. Visual neurones responsive to faces in the monkey temporal cortex.  
973 *Exp Brain Res* **47**:329–342. doi:10.1007/BF00239352
- 974 Pessoa L, Gutierrez E, Bandettini P, Ungerleider L. 2002. Neural correlates of visual working memory:  
975 fMRI amplitude predicts task performance. *Neuron* **35**:975–987. doi:10.1016/S0896-  
976 6273(02)00817-6
- 977 Posner MI, Petersen SE. 1990. The Attention System of the Human Brain. *Annu Rev Neurosci* **13**:25–42.  
978 doi:10.1146/annurev.ne.13.030190.000325
- 979 Price AR, Bonner MF, Peelle JE, Grossman M. 2017. Neural coding of fine-grained object knowledge in  
980 perirhinal cortex. *bioRxiv* **194829**:1–18. doi:doi.org/10.1101/194829

- 981 Rajimehr R, Young JC, Tootell RBH. 2009. An anterior temporal face patch in human cortex, predicted by  
982 macaque maps. *Proc Natl Acad Sci U S A* **106**:1995–2000. doi:10.1073/pnas.0807304106
- 983 Ramon M, Vizioli L, Liu-Shuang J, Rossion B. 2015. Neural microgenesis of personally familiar face  
984 recognition. *Proc Natl Acad Sci U S A* **112**:E4835–E4844. doi:10.1073/pnas.1414929112
- 985 Ress D, Backus BT, Heeger DJ. 2000. Activity in primary visual cortex predicts performance in a visual  
986 detection task. *Nat Neurosci* **3**:940–945. doi:10.1038/78856
- 987 Rossion B, Dricot L, Devolder A, Bodart JM, Crommelinck M, De Gelder B, Zoontjes R, Gelder B De,  
988 Zoontjes R. 2000. Hemispheric asymmetries for whole-based and part-based face processing in the  
989 human fusiform gyrus. *J Cogn Neurosci* **12**:793–802. doi:10.1162/089892900562606
- 990 Rossion B, Hanseeuw B, Dricot L. 2012. Defining face perception areas in the human brain: A large-scale  
991 factorial fMRI face localizer analysis. *Brain Cogn* **79**:138–157. doi:10.1016/j.bandc.2012.01.001
- 992 Saad ZS, Reynolds RC. 2012. SUMA. *Neuroimage* **62**:768–773. doi:10.1016/j.neuroimage.2011.09.016
- 993 Sadaghiani S, Hesselmann G, Kleinschmidt A. 2009. Distributed and antagonistic contributions of ongoing  
994 activity fluctuations to auditory stimulus detection. *J Neurosci* **29**:13410–13417.  
995 doi:10.1523/JNEUROSCI.2592-09.2009
- 996 Smith SM, Beckmann CF, Andersson J, Auerbach EJ, Bijsterbosch J, Douaud G, Duff E, Feinberg DA,  
997 Griffanti L, Harms MP, Kelly M, Laumann T, Miller KL, Moeller S, Petersen S, Power J, Salimi-  
998 Khorshidi G, Snyder AZ, Vu AT, Woolrich MW, Xu J, Yacoub E, Uğurbil K, Van Essen DC, Glasser MF.  
999 2013. Resting-state fMRI in the Human Connectome Project. *Neuroimage*, Mapping the  
1000 Connectome **80**:144–168. doi:10.1016/j.neuroimage.2013.05.039
- 1001 Stigliani A, Weiner KS, Grill-Spector K. 2015. Temporal processing capacity in high-level visual cortex is

- 1002 domain specific. *J Neurosci* **35**:12412–12424. doi:10.1523/JNEUROSCI.4822-14.2015
- 1003 Szczepanski SM, Pinsk MA, Douglas MM, Kastner S, Saalmann YB. 2013. Functional and structural  
1004 architecture of the human dorsal frontoparietal attention network. *Proc Natl Acad Sci U S A*  
1005 **110**:15806–15811. doi:10.1073/pnas.1313903110
- 1006 Taylor AJ, Kim JH, Ress D. 2018. Characterization of the hemodynamic response function across the  
1007 majority of human cerebral cortex. *Neuroimage* **173**:322–331.  
1008 doi:10.1016/j.neuroimage.2018.02.061
- 1009 Thanh Vu A, Jamison K, Glasser MF, Smith SM, Coalson T, Moeller S, Auerbach EJ, Uğurbil K, Yacoub E.  
1010 2017. Tradeoffs in pushing the spatial resolution of fMRI for the 7T Human Connectome Project.  
1011 *Neuroimage*, Cleaning up the fMRI time series: Mitigating noise with advanced acquisition and  
1012 correction strategies **154**:23–32. doi:10.1016/j.neuroimage.2016.11.049
- 1013 Tong F, Nakayama K, Vaughan JT, Kanwisher N. 1998. Binocular rivalry and visual awareness in human  
1014 extrastriate cortex. *Neuron* **21**:753–759. doi:10.1016/S0896-6273(00)80592-9
- 1015 Troiani V, Dougherty CC, Michael AM, Olson IR. 2016. Characterization of face-selective patches in  
1016 orbitofrontal cortex. *Front Hum Neurosci* **10**:1–14. doi:10.3389/fnhum.2016.00279
- 1017 Troiani V, Patti MA, Adamson K. 2019. The use of the orbitofrontal H-sulcus as a reference frame for  
1018 value signals. *Eur J Neurosci n/a*:ejn.14590. doi:10.1111/ejn.14590
- 1019 Tsao DY, Freiwald WA, Knutsen TA, Mandeville JB, Tootell RBH. 2003. Faces and objects in macaque  
1020 cerebral cortex. *Nat Neurosci* **6**:989–995. doi:10.1038/nn1111
- 1021 Tsao DY, Freiwald WA, Tootell RBH, Livingstone MS. 2006. A cortical region consisting entirely of face-  
1022 selective cells. *Science (80- )* **311**:670–674. doi:10.1126/science.1119983

- 1023 Tsao DY, Moeller S, Freiwald WA. 2008a. Comparing face patch systems in macaques and humans. *Proc*  
1024 *Natl Acad Sci U S A* **105**:19514–19519. doi:10.1073/pnas.0809662105
- 1025 Tsao DY, Schweers N, Moeller S, Freiwald WA. 2008b. Patches of face-selective cortex in the macaque  
1026 frontal lobe. *Nat Neurosci* **11**:877–879. doi:10.1038/nn.2158
- 1027 Tyler LK, Chiu S, Zhuang J, Randall B, Devereux BJ, Wright P, Clarke A, Taylor KI. 2013. Objects and  
1028 categories: Feature statistics and object processing in the ventral stream. *J Cogn Neurosci* **25**:1723–  
1029 1735. doi:10.1162/jocn\_a\_00419
- 1030 van Ede F, de Lange FP, Maris E. 2012. Attentional cues affect accuracy and reaction time via different  
1031 cognitive and neural processes. *J Neurosci* **32**:10408–10412. doi:10.1523/JNEUROSCI.1337-12.2012
- 1032 Vogels R, Orban GA. 1994. Activity of inferior temporal neurons during orientation discrimination with  
1033 successively presented gratings. *J Neurophysiol* **71**:1428–1451. doi:10.1152/jn.1994.71.4.1428
- 1034 Vuilleumier P, Armony JL, Driver J, Dolan RJ. 2001. Effects of attention and emotion on face processing  
1035 in the human brain: An event-related fMRI study. *Neuron* **30**:829–841. doi:10.1016/S0896-  
1036 6273(01)00328-2
- 1037 Wang SSH, Shultz JR, Burish MJ, Harrison KH, Hof PR, Towns LC, Wagers MW, Wyatt KD. 2008. Functional  
1038 trade-offs in white matter axonal scaling. *J Neurosci* **28**:4047–4056. doi:10.1523/JNEUROSCI.5559-  
1039 05.2008
- 1040 Wilcox R. 2005. Introduction to Robust Estimation and Hypothesis Testing, Technometrics. Academic  
1041 Press. doi:10.1198/tech.2005.s334
- 1042 Willenbockel V, Sadr J, Fiset D, Horne GO, Gosselin F, Tanaka JW. 2010. Controlling low-level image  
1043 properties: The SHINE toolbox. *Behav Res Methods* **42**:671–684. doi:10.3758/BRM.42.3.671



- 1044 Wojciulik E, Kanwisher N, Driver J. 1998. Covert visual attention modulates face-specific activity in the  
1045 human fusiform gyrus: fMRI study. *J Neurophysiol* **79**:1574–1578. doi:10.1152/jn.1998.79.3.1574
- 1046 Young IR, Cox IJ, Bryant DJ, Bydder GM. 1988. The benefits of increasing spatial resolution as a means of  
1047 reducing artifacts due to field inhomogeneities. *Magn Reson Imaging* **6**:585–590.  
1048 doi:10.1016/0730-725X(88)90133-6
- 1049 Zhang H, Japee S, Nolan R, Chu C, Liu N, Ungerleider LG. 2016. Face-selective regions differ in their ability  
1050 to classify facial expressions. *Neuroimage* **130**:77–90. doi:10.1016/j.neuroimage.2016.01.045
- 1051 Zhang RY, Kay K. 2020. Flexible top-down modulation in human ventral temporal cortex. *Neuroimage*  
1052 **218**:116964. doi:10.1016/j.neuroimage.2020.116964
- 1053
